# Supplementary material for: Functional spatial contextualisation of the effects of multiple stressors in marine bivalves
Source: Copernicus journal article supplement (doi:10.5194/bg-2018-13), 2018-01-22
Supplement: Supplementary file [file bg-2018-13-AC2-supplement.pdf]

## REVIEWER #1

**Reviewer wrote:** This paper explores the implications of environmental stress (OA and hypoxia), as determined in lab experiments, on the growth and reproductive potential of mussels in two locations of the Mediterranean with simulations based on a dynamic energy budget model. The study capitalizes on the potential of DEB models to integrate the impacts of multiple environmental drivers on organismal level outcomes, including growth, reproduction, time to maturity, rates of feeding and respiration, and so on. This approach is powerful in potential and the application is new. However, there are some important shortcomings, especially in the way the model is parameterized. Also, I find the lack of some form of quality assessment problematic.

**Author's reply:** First, we thank the Reviewer #1 for the effort in providing his/her suggestions to the original version of our ms.

**Author's changes:** Apart from all possible not clear parts that we accordingly improved, we followed his/her suggestion in the hope to have increased the quality of this ms.

**Reviewer wrote:** It is very annoying that all sections consist of a single paragraph. Did something go wrong with the formatting of the manuscript?

**Author's reply:** We appreciated the referee's suggestion about the different paragraphs, but we believe that the current structure is already sufficiently sectioned; to increase the number of paragraphs or sub-paragraphs can only increase the text fragmentation which may limit the logical flow of the text.

**Reviewer wrote:** The author's use of respiration measurements as a proxy for DEB maintenance costs is problematic. In the DEB framework, respiration is emphatically not the same as maintenance, but also include energetic overheads, such that of growth. Respiration is a function of the commitment rate in DEB, of which maintenance could be a minor part, depending on size and nutritional status of the animal.

**Author's reply:** We acknowledge that respiration does not include only maintenance, but also include energetic overheads, such as growth. Nevertheless, there is no way - to our knowledge - to measure the different contribution of every energetic components apart from to experimentally measure oxygen consumption as a proxy for metabolism. Also, the proposed approaches measuring indirectly the  $[\dot{p}_M]$  values (e.g. van der Veer et al., 2006; Ren and Schiel 2008), are not feasible in the context of the present experimental asset. While this approach is not experimentally feasible when assessing the effect of stressors on the energy budget, the only way to indirectly provide an estimation of the effect of disturbance is through the Jagger et al. (2016) approach which is based on the stress factor "s". Thus, after estimating the effect induced by a treatment on the oxygen consumption, that in the present case study was expressed as a percentage variation, we summed/subtracted the energetic amount due to the effect of a stressor to the species-specific  $[\dot{p}_M]$  values of *M. galloprovincialis* then we run our models. However, we thank the referee for highlighting this point whose importance was addressed in the Discussion section of this ms. as we believe that is crucial to increase our understating on how we can mechanistically assess the effect of disturbance on individual performances through the DEB model. All these limitations show how much is important to date to increase the experimental and theoretical research effort in order to unravel this point, which is increasingly crucial to get realistic answers to management questions in a context of environmental change.

**Reviewer wrote:** In addition, oxygen deprived mussels, and possibly mussels enduring stress of hypercapnia, are able to use anaerobic metabolic pathways to fulfil their maintenance requirements. If stress increases maintenance requirements, one would expect respiration rates to increase with increasing stress intensity. However, we see the opposite happen (see Fig 2).

I think this is likely due to the fact that stressed mussels have their shells closed more often than unstressed conspecifics (see Fig. 1), and thus ingest less food. Less food leads to a lower energy reserve buffer and therefore a lower rate at which reserves are committed.

**Author's reply:** As reported in our results and Fig. 2, maintenance requirements in accordance with respiration rates, decreases with stress in agreement with what is reported in the current literature. We are sorry with Reviewer #1 and with all readers as we made a mistake in writing the text commenting the figure 1 (we wrote wrongly "opened" instead of "closed"). Actually, our mussels increased their openness with the increasing stressful conditions. At the present stage, we are not able to provide information about the amount of ingested food under different treatments and then we are not able to infer on the effect of openness degree on energetic performances.

**Author's changes:** Figure was fixed according to both referee's suggestion, and also the text in the paragraph has been rephrased accordingly.

**Reviewer wrote:** I suggest the authors change the maximum assimilation rate parameter of their model based on their behavioural observations and leave the maintenance rate parameter unchanged.

**Author's reply:** We appreciated the referee's suggestion but we prefer to focus on both the assimilation efficiency and the metabolic effect (through pM) as i) the main effect of acidification seem to be exerted on metabolism as widely reported in the current literature, and ii) also to show that our mechanistic DEB approach can be really effective in measuring the multiple stressor's effect on LHs.

**Author's changes:** Thus, we enlarged the discussion on these points to include possible shortcomings deriving from the fact that the stressor's effect on maintenance is not still well-experimentally measurable.

**Reviewer wrote:** The simulations suggest that unstressed mussels only grow to 3 cm in length and do not reproduce in Palermo. This seems implausible. How long do real mussels get in Palermo? Do they reproduce? How sensitive are the simulation results to the particular choices of parameter values? The authors do not reflect at all on the reliability of their assessments, which I find troublesome, especially given the politicized context of the subject matter.

**Author's reply:** Actually, to enlarge the discussion about the magnitude of effects at local level could be not influent for our purposes, although our results are in line with the environmental and trophic conditions reported in section 2.5: "Both sites were chosen as they represent two opposite temperature and food conditions for mussel growth in Italy... etc.". *M. galloprovincialis* in Sicily is observed to be limited by oligo-trophic conditions although it grows in highly trophic-enriched areas such as harbours or under Integrated Multi-Trophic Aquaculture (IMTA) conditions (Sarà et al 2012; 2013b, Giacoletti et al. 2018 in press JEMA) which supports what we gathered in the present ms. through the DEB simulations.

#### **Reviewer specific comment n. 1**

**Reviewer wrote:** Title. Functional spatial contextualization sounds impressive but I've no clue what it could mean. Also, the manuscript deals with only a single species; the title is too general.

**Author's changes:** We agreed with Reviewer's #1 point and changed the title.

#### **Reviewer specific comment n. 2**

**Reviewer wrote:** L27-33 Split up sentence.

**Author's changes:** Sentence was splitted up accordingly.

**Reviewer specific comment n. 3**

**Reviewer wrote:** L35 (and elsewhere) Put reference in the proper place of the sentence

**Author's changes:** All references were checked and put in proper spaces.

**Reviewer specific comment n. 4**

**Reviewer wrote:** L40 'lager'?

**Author's changes:** Changed with "larger".

**Reviewer specific comment n. 5**

**Reviewer wrote:** L68-70. This is a strong statement and should be substantiated with references. BTW, the only 2 papers using DEB in a OA context I'm aware of are 10.1111/gcb.12547 and 10.1016/j.jembe.2015.09.016

**Author's changes:** References regarding the effect of OA on functional traits such as feeding and assimilation, and on maintenance costs has been added accordingly.

**Reviewer specific comment n. 6**

**Reviewer wrote:** L72 the DEB [p\_M] parameter does not relate to assimilation

**Author's changes:** The sentence was rephrased accordingly.

**Reviewer specific comment n. 7**

**Reviewer wrote:** L83 articulated ! consisted of

**Author's changes:** Changed accordingly.

**Reviewer specific comment n. 8**

**Reviewer wrote:** Section 2.4 contains material that should go in 2.3 (or combine the sections).

**Author's reply:** Section 2.4 refers to assimilation efficiency, while section 2.3 to oxygen consumption measures, so we consider not easy to combine both sections as we may incur in the risk to reduce the readability of this section.

**Reviewer specific comment n. 9**

**Reviewer wrote:** I didn't get how the authors calculate the assimilation efficiency.

**Author's changes:** A detailed explanation on how the assimilation efficiency was estimated, was added with supporting references.

**Reviewer specific comment n. 10**

**Reviewer wrote:** Section 3.1 belongs in the Materials and Methods Section. There is no need for a statistical analysis. Delete Table 2.

**Author's changes:** Table 2 was deleted according to both referee's suggestion and details were moved in the Materials and Methods Section.

**Reviewer specific comment n. 11**

**Reviewer wrote:** Combine Sections 3.2-4. There is no need to duplicate in the text what is already presented in the figures. The percentage of closed valves is simply 100 – percentage opened valves, so don't mention the former. I don't understand why the error measures differ so much, though.

**Author's changes:** We agree not to duplicate in text what is already presented in figures, and we worked to avoid this replication. Following Reviewer's #1 suggestion we also expressed

the percentage of closed valves 100 – percentage opened valve. Instead, merging the sections can increase the risk of confusion in the reader as section 3.2 is about behavioural observations, while the other two are about physiological measurements.

**Reviewer specific comment n. 12**

**Reviewer wrote:** Section 2.7 is incomprehensible for people without DEB modeling background. Include a figure and references to overview texts (e.g. Kooijman's book, Nisbet et al JAE, Sousa et al, and/or most recently Jusup et al Physics of Life Reviews 20:1-39).

**Author's changes:** We agree with Reviewer #1 that section 2.7 is difficult for someone without a DEB modelling background, and in order to made it more clear we added the suggested references and rephrased some parts.

**Reviewer specific comment n. 13**

**Reviewer wrote:** L263 addictive ! additive. The way the authors use 'additive' is confusing. Additive refers to impacts that can be summed, like  $1+1=2$ , an unlikely situation with nonlinear models, such as DEB.

**Author's changes:** Rephrased following suggestions to "with a progressive contribution of hypoxia".

**Reviewer specific comment n. 14**

**Reviewer wrote:** What are the initial conditions of the simulation runs?

**Author's reply:** Results of simulation performed with unstressed organism were already reported in Table 5, while model parameters have been reported in Table 1.

**Reviewer specific comment n. 15**

**Reviewer wrote:** What is the rational for the choices for the frequency of events?

**Author's reply:** While we are aware that hypoxia events are more frequently during summertime, we decided to not apply any timing and frequency scheme to simulate hypoxia event's occurrence according to many papers published across the recent literature(Crain et al. 2008 Ecology Letters; Miller et al. 2009 PNAS).

**Reviewer specific comment n. 16**

**Reviewer wrote:** From Table 5 remove data that are already presented in Figure 3. Round off # of eggs to  $6.74e6$ . Units of frequency should be 1/time

**Author's changes:** Table 5 was corrected accordingly.

**Reviewer specific comment n. 17**

**Reviewer wrote:** Figure 3 label y axis 'Change relative to control'

**Author's changes:** Figure was corrected accordingly.

**Reviewer specific comment n. 18**

**Reviewer wrote:** L294 delete 'formally'

**Author's changes:** Deleted.

**Reviewer specific comment n. 19**

**Reviewer wrote:** L295 delete 'compensatory' and change contrast to compensate

**Author's changes:** Rephrased.

**Reviewer specific comment n. 20**

**Reviewer wrote:** L299 suppressed feeding activity

**Author's changes:** Changed.

**Reviewer specific comment n. 21**

**Reviewer wrote:** L304 what is crossing effect?

**Author's changes:** Sentence has been rephrased accordingly.

**Reviewer specific comment n. 22**

**Reviewer wrote:** L306 on! over. 'that' doesn't refer to anything

**Author's changes:** Rephrased.

**Reviewer specific comment n. 23**

**Reviewer wrote:** L333 sustainable and reliable ! practical

**Author's changes:** Changed.

**Reviewer specific comment n. 24**

**Reviewer wrote:** L337 write out TW, TRO and TM

**Author's changes:** Written out accordingly.

**Reviewer specific comment n. 25**

**Reviewer wrote:** The readability of the manuscript would improve if there were fewer references. Remove unnecessary repetitive references.

**Author's changes::** All the references has been checked and unnecessary and repetitive ones have been deleted accordingly.

1 **Predicting the multiple effects of acidification and hypoxia**  
2 **on *Mytilus galloprovincialis* (Bivalvia, Mollusca) life**  
3 **history traits**

4 ~~**Functional spatial contextualisation of the effects of**~~  
5 ~~**multiple stressors in marine bivalves**~~

6 Antonio Giacoletti\* and Gianluca Sarà

7 Dept. of Earth and Marine Sciences (DISTEM) University of Palermo, Palermo, Italy;

8 *Correspondence to:* Antonio Giacoletti (antonio.giacoletti@unipa.it)

9  
10 **Abstract.** Many recent studies have revealed that the majority of environmental stressors experienced by marine  
11 organisms (ocean acidification, global warming, hypoxia etc.) occur at the same time and place, and that their  
12 interaction may complexly affect a number of ecological processes. Here, we experimentally investigated the  
13 effects of pH and hypoxia on the functional and behavioural traits of the mussel *Mytilus galloprovincialis*, we  
14 then simulated the potential effects on growth and reproduction dynamics through a Dynamic Energy Budget  
15 (DEB) model under a multiple stressor scenario. Our simulations showed that hypercapnia had a remarkable  
16 effect by reducing the maximal habitat size and reproductive output differentially as a function of the trophic  
17 conditions, where modelling was spatially contextualized. This study showed the major threat represented by the  
18 hypercapnia and hypoxia phenomena for the growth, reproduction and fitness of mussels under the current  
19 climate change context, and that a mechanistic approach based on DEB modelling can illustrate complex and  
20 site-specific effects of environmental change, producing that kind of information useful for management  
21 purposes, at larger temporal and spatial scales.

22 Key-words: Acidification; Climate change; DEB Model; Hypoxia; *Mytilus galloprovincialis*; Multiple-Stressor;  
23 Mussel.

24

## 1 Introduction

25 Since the dawn of research investigating the possible effects of ocean acidification (OA) on aquatic organisms  
26 (e.g. Bamber, 1990), most studies have shown that elevated pCO<sub>2</sub> levels, as predicted for the next century, may  
27 affect –to some extent the functional traits (Schoener, 1986; Koehl, 1989) of marine organisms (Feely et al.,  
28 2004; Navarro et al., 2013). Referring to functional traits, we consider all those specific traits that define each  
29 species in terms of their ecological roles (Diaz & Cabido, 2001), and thereby the species’ identity. In marine  
30 ectotherms such as bivalves, crabs, sea urchins and fish, these traits include tolerance and sensitivity to  
31 environmental conditions (e.g. physiological tolerance limits - Kearney & Porter, 2009) defining the ability of  
32 each species to support their own metabolic machinery (Sokolova et al., 2012; Sarà et al., 2014), ~~They further~~  
33 ~~include~~ the ability to obtain energy from food, the so-called functional response (Holling, 1959) or those  
34 behavioural (e.g. swimming behaviour, habitat use, mating system) and morphological (e.g. shape, thickness)  
35 traits (~~Schoener, 1986~~) which led to optimise the energetic income (Krebs & Davies, 1992) and lastly to reach  
36 the ultimate fitness (Roff, 1992).

37 Research performed over the last decade and summarized in the recent IPCC (2014) report (~~IPCC, 2014~~) clearly  
38 shows that ocean acidification will affect marine organisms and ecosystems (Connell et al., 2017) in the coming  
39 decades, and such projections have stimulated new research that aims to understand the impact on calcifying  
40 marine organisms. Reductions in growth and calcification rates are just those kinds of the physiological impacts  
41 of ocean acidification (Thomsen et al., 2013; Byrne, 2012; Beniash et al., 2010). While much research showed  
42 that low pH may impair most functional traits (e.g. respiration), functions connected with energy uptake such as  
43 feeding and assimilation seem to be reduced at a larger extent in many species with expected implications for the  
44 amount of energy available for growth and reproduction (Kurihara et al., 2008; Appelhans, 2012; Navarro et al.,  
45 2013; Zhang et al., 2015). Such information has been obtained through both acute and chronic exposure to OA  
46 but no studies are yet available to assess the potential effects of OA on the magnitude of other Life History (LH)  
47 traits, such as maximum habitat body size, fecundity, time to reach maturation and the number of spawning  
48 events under future conditions of environmental change (*sensu* Kearney and Porter, 2009; Sarà et al., 2011;  
49 2013b). ~~To obtain such LH traits, experiments should be long enough to assure a functional effect of lower pH~~  
50 ~~for many weeks or months but probably no existing lab mesocosm could currently assure the stability of~~  
51 ~~seawater acidification system for such a long time.~~ Thus, apart from long term experiments carried out in few  
52 field sites worldwide (e.g. Ischia [Hall-Spencer et al., 2008] and Vulcano [Duquette et al., 2015] islands) in the  
53 Southern Mediterranean Sea and in other Seas (Maug Island [Pala, 2009] or ~~CO<sub>2</sub> vents in the SW~~ southwest

54 Pacific [Connell et al., 2017]) where lowered pH seawater is naturally available ~~through CO<sub>2</sub> natural emissions~~  
55 ~~from vents~~, the recent introduction of mechanistic functional trait-based (FT) models based on the Dynamic  
56 Energy Budget theory (DEB; Kooijman, 2010) can offer a reliable opportunity for disentangling the effect of  
57 ~~OA seawater acidification~~ on LH traits.  
58 Functional trait-based DEB (FT-DEB) approach (Kearney and Porter 2009; Kearney et al., 2010; Kearney 2012;  
59 Sarà et al., 2011, 2012, 2013a, b, 2018) relies on the quantitative prediction of organismal functional traits and  
60 fecundity within the fundamental niche limits of one particular species (Hutchinson 1957). Such an approach  
61 aim to exploit mechanistic rules to connect environmental human-induced variability to functional traits  
62 (Schoener 1986; Diaz & Cabido 2001) and in turn functional traits to species LH (Stearns 1992) traits. The  
63 novelty of the FT-DEB approach relies on its intrinsic mechanistic nature deriving from the fact that it is based  
64 on flux of energy and mass through an organism which are traceable processes that are subject to conservation  
65 laws (according to the new posited concept of ecomechanics; Denny & Helmuth, 2009; Denny & Benedetti-  
66 Cecchi, 2012; Carrington et al., 2015). This provides an exceptionally powerful tool to predict organismal  
67 functional traits, capturing variation across species to solve a very wide range of problems in ecology and  
68 evolutionary biology (Lika et al., 2011; Kearney, 2012; Pouvreau et al., 2006; Pequerie et al., 2010; Sarà et al.,  
69 2011; 2012; 2013a; 2013b; 2014). FT-DEB could provide information about the effect of ~~seawater~~ acidification  
70 on the fecundity (as expressed by the number of gametes per life span, the so-called Darwinian fitness;  
71 Bozinovic et al., 2011) and the degree of reproductive failure of species providing theoretical predictions about  
72 LH traits having implications on population dynamics and community structure throughout the species range  
73 (Sarà et al., 2013a). Here, we specifically exploited the FT-DEB model spatially and explicitly contextualised  
74 along the Italian coasts under subtidal conditions (~~Kearney et al., 2010; Sarà et al., 2011; 2012; 2013a; 2013b~~),  
75 using four-year thermal series and satellite ~~Chlorophyll~~ chlorophyll-a (CHL-a) concentrations, to test the multiple  
76 effect due to the combination of pH and hypoxia on the physiological and behavioural traits of our target species,  
77 the bivalve *Mytilus galloprovincialis* (Lamarck 1819).  
78 Recent insights obtained by the experimental research have shown that OA mainly affects feeding rates (FR),  
79 assimilation efficiency (AE) and maintenance costs ~~s-rates~~ of marine organisms (Appelhans, 2012; Navarro et al.  
80 2013; Kroeker et al. 2014; Zhang et al., 2015; Jager et al. 2016). Here, we translated the combined effects of  
81 hypoxia and hypercapnia on ~~AE-assimilation~~ and oxygen consumption rates as measured under different  
82 treatments into effects on assimilation AE and somatic maintenance costs ~~as expressed by the DEB [p<sub>M</sub>]~~  
83 ~~parameters~~. Somatic maintenance is a crucial suite ~~This latter is a crucial of~~ functional traits used in recent



84 bioenergetics based on the DEB theory that mechanistically can be used to investigate the role played by  
85 multiple stressors on LH traits of organisms by using first principles (Sarà et al., 2014). We further documented  
86 the effects of those stressors on *M. galloprovincialis* shells through the use of a scanning electron microscope  
87 (SEM), and compared the maximum shell breaking load of treated vs. control specimens. A behavioural analysis  
88 completed the frame concerning the individual's response to both single and combined stressors. Carried out in a  
89 context of OA, this exercise comprises a first step in linking the fields of ecomechanics and climate change  
90 ecology, which should yield a more mechanistic understanding of how biodiversity will respond to  
91 environmental change (*sensu* Buckley et al., 2012).

92

93

## 2 Materials and methods

94 This study ~~articulated-consisted of~~ three steps: 1) laboratory investigation on the effects of pH and hypoxia on  
95 functional ~~and (both~~ behavioural and physiological traits of *Mytilus galloprovincialis*; 2) collection of water  
96 temperature data; and ~~Chlorophyll a (CHL-a)~~ data from two Mediterranean sites (Trieste and Palermo), as a  
97 further forcing variable in the DEB model and lastly 3) model running to simulate growth and fitness of *M.*  
98 *galloprovincialis* under stressful conditions by using ~~estimated~~ DEB parameters estimated arising from by the  
99 activities in the first step.

100

101 **2.1 Sampling and eExperimental set-up.** Specimens of *M. galloprovincialis* (45 - 55 mm) were provided by  
102 the Ittica Alimentare Soc. Coop. Arl. (Palermo) and transferred within 30 minutes to the laboratory. Mussels  
103 were then carefully cleaned and placed in a 300L tank filled with natural seawater at room temperature (18-  
104 20°C), field salinity (37-38 ~~PSU~~), and fed *ad libitum* with cultured *Isochrysis galbana* (Sarà et al., 2011).  
105 ~~According to common experimental procedures for studying the bioenergetics of bivalves (Sarà et al., 2008;~~  
106 ~~Ezgeta Balic et al., 2011), m~~Mussels were acclimated for two weeks to reduce stress generated by manipulation  
107 and transport (Sarà et al., 2013a); ~~and~~ ~~once~~ once acclimated, 200 specimens were randomly divided in groups of 25  
108 organisms, transferred to 8 independent rectangular glass tanks of 120L capacity (100 cm long, 30 cm deep, 40  
109 cm wide) and kept in a conditioned room at 21°C for 4 weeks according to common protocol with bivalves  
110 (Braby & Somero 2006; Fields et al., 2012; Kittner and Riisgård 2005). Tanks 1 to 4 were filled with sea water  
111 and continuously with aerated through air pumps~~and recirculating sea water~~, while Tanks 5 to 8 were not aerated  
112 and covered with a plastic film disposed on the water surface, in order to avoid gas-exchanges between air and  
113 water. Tanks 1-2 were used as a control (CTRL), while hypercapnia was imposed in Tanks 3-4 (Tr1), hypoxia (2

114 ppm) in Tanks 5-6 (Tr2), and both factor (pH 7.5 and hypoxia) in Tanks 7-8 (Tr3) (see Table 2). Mussels were  
115 acclimated to two different nominal pH treatments: (i) pH 8.0 in Tanks 1-2 (CTRL) and 5-6 (Tr2), corresponding  
116 to present average pH at the sampling site; and (ii) pH 7.5 in Tanks 2-3 (Tr1) and 7-8 (Tr3), deviating from  
117 present range of natural variability and relevant for 2100 ocean acidification scenarios. ~~This last point is~~  
118 ~~considered the critical dissolution threshold of calcium carbonate in shelled animals as reported in literature~~  
119 (Melzner et al., 2011; Gazeau et al., 2013). The carbonate system speciation ( $p\text{CO}_2$ ,  $\text{HCO}_3^-$ ,  $\text{CO}_3^{2-}$ ,  $\Omega\text{Ca}$  and  
120  $\Omega\text{Ar}$ ) was calculated from  $\text{pH}_{\text{NBS}}$ , temperature, salinity and alkalinity ( $T_A = 2.5 \text{ mM}$ ; Rivaro et al., 2010) using  
121 CO2SYS (see Table 2; Lewis and Wallace, 1998) with dissociation constants from Dickson & Millero (1987).  
122 The pH was manually controlled 8 times a day by an electronic pH-meter (Cyberscan 510, Eutech Instruments;  
123 accuracy =  $\pm 0.01 \text{ pH}$ ) and gaseous  $\text{CO}_2$  was injected directly into the aquarium through a commercial ceramic  
124 diffusor, when required. ~~Oxygen concentration and temperature were monitored with the same frequency~~  
125 ~~through the PiroScience FirestingO2 oxygen logger equipped with a dedicated temperature sensor. Water~~  
126 ~~movement and recirculation were assured by water pumps.~~ Tanks were siphoned at the end of each working day,  
127 removing all the faecal material in order to avoid the accumulation of waste products, ~~and 20% of water was~~  
128 ~~weekly changed with specific pre-conditioned sea water for each treatment.~~

129  
130 **2.2 Behavioural observations.** The valve gape of mussels was recorded by means of the two simplest  
131 behavioural categories reported in Jørgensen et al. (1988): closed valves and opened valves. Each observation  
132 was carried out by an operator with the aim to record changes in the behavioural repertoire of bivalves in  
133 response to the exposure to a single stressor (pH or hypoxia) and to both pH and hypoxia, compared to  
134 individuals kept in normal environmental conditions. All experiments were conducted at environmental (37-38  
135 PSU) salinity and with well-aerated sea water through a gentle flow (Ameyaw-Akumfi & Naylor, 1987), except  
136 for specimens of Tank 5-6 and 7-8, that were not aerated in order to maintain the hypoxia level set through the  
137 gaseous nitrogen. Behavioural observations were repeated six times a day ~~at week 1 and 4 of exposure, on day 7,~~  
138 ~~14, 21, 28, and involved involving~~ 5 random specimens for each treatment.

139  
140 **2.3 Oxygen consumption.** The rate of oxygen consumption was determined twice (week 1 and week 4) in a  
141 respirometric glass chamber (0.3L) inside a temperature-controlled water bath, in order to ~~compare-investigate~~  
142 the effects of multiple stressors ~~by converting rates into~~ metabolic somatic maintenance costs ~~-the DEB~~  
143 ~~parameter [ $p_M$ ] (expressed as  $\text{J cm}^{-3} \text{ h}^{-1}$ ) linked to the energetic cost of maintenance in order~~ and to integrate it in

144 the standard DEB model. [Volume-specific somatic maintenance costs, as expressed by the  \$\[\dot{p}\_M\]\$  parameter \( \$J\ cm^{-3}\$](#)   
145 [h<sup>-1</sup>\), represent the amount of energy needed to fuel basal metabolism \( \$\dot{p}\_M\$ \) scaled with the organisms' volume,](#)  
146 [such as  \$\[\(\dot{p}\_M\)\] = \dot{p}\_M/V\$ .](#) All determinations were performed [at 21°C](#) using filtered seawater with the same pH and  
147 oxygen content as that of the respective treatment, stirred with a magnetic stirrer bar beneath a perforated glass  
148 plate supporting each individual (~~Sarà et al., 2008;~~ Ezgeta-Balic et al., 2011). The decline in oxygen  
149 concentration was measured by a PiroScience FirestingO2 respirometer, capable of four sensor connections. We  
150 used a total of n = 64 mussels per week, 16 for each treatment (8 for each tank) acclimated as above, fed *ad*  
151 *libitum* until the day before the experiment. The decline was continuously recorded for at least 1 h, excluding an  
152 initial period (~ 10 min) when usually there is a more rapid decline in oxygen caused by a disturbance of the  
153 sensor's temperature equilibration. Respiration rate (RR,  $\mu\text{mol O}_2\ \text{h}^{-1}$ ) was calculated according to (~~Ezgeta-Balic~~  
154 ~~et al., 2011;~~ Sarà et al., 2008;–2013b):  $RR = (C_{t0} - C_{t1}) \times Vol_r \times 60 (t_1 - t_0)^{-1}$ , where  $C_{t0}$  is oxygen  
155 concentration at the beginning of the measurement,  $C_{t1}$  is the oxygen concentration at the end of the  
156 measurement, and  $Vol_r$  is the volume of water in the respirometric chamber. [Volume-specific somatic](#)  
157 [maintenance costs were then calculated by converting oxygen consumption rates expressed in  \$\mu\text{mol h}^{-1}\$  in  \$J\ h^{-1}\$](#)   
158 [through a conversion factor \(Kooijman 2010\) and then in  \$J\ \text{cm}^{-3}\$  \(van der Veer et al., 2006; Ren and Schiel 2008\)](#)  
159 [\(for the calculation of dry weights refer to the end of section 2.4\).](#)

160  
161 **2.4 Assimilation efficiency.** [Assimilation is the final step of food processing and it represents the efficiency with](#)  
162 [which organic material is absorbed from the ingested food \(Kooijman, 2010\). The assimilation of food is](#)  
163 [assumed to be independent of the feeding rate \*per se\*, but proportional to the ingestion rate \(Kooijman, 2010\).](#)  
164 [Assimilation efficiency \(AE\) was measured through the Conover ratio \(1966\)  \$AE = \(F - E\) / \[\(1 - E\)F\]\$ , where](#)  
165 [F is the ratio between ash-free dry weight \(AFDW\) and dry weight \(DW\) for food, and E is the same ratio for the](#)  
166 [faeces; this represents the efficiency with which organic material is absorbed from the ingested food material.](#)  
167 Here, [after oxygen consumption measurement, the same 16-specimens of \*M. galloprovincialis\* per treatment](#)  
168 [were collected twice \(week 1 and week 4\) and](#) placed into separate beakers containing 1L of filtered seawater  
169 [\(specific for each treatment\)](#) and a magnetic stirrer bar. In order to allow the mussels to open their valves and  
170 start their filtration activity, they were given 15 minutes before the introduction of food with an initial  
171 concentration of ~ 15,000 *Isochrysis galbana* cells  $\text{mL}^{-1}$ . After a period of 2 h mussels were moved to cleaned 1L  
172 glass beakers with filtered seawater for a period of 12 h, after that the water contained in each beaker was filtered  
173 on pre-ashed and weighted GF/C fibreglass filters. Once filtered, filters were washed with 0.5 M ammonium

174 formate (purest grade) to remove adventitious salts (~~Widdows & Staff, 2006~~[Sarà et al., 2013a](#)), dried in the oven  
175 (95°C for 24 h) and then incinerated in a muffle furnace (450°C for 4 h). After each step, the samples were  
176 weighted using a balance (Sartorius BL 120S ± 1µg). For the calculation of AE, together with the faeces  
177 collected from the mussels, filters containing algal food were dried and incinerated as above. After respirometric  
178 measurement and the collection of faeces each animal was killed by gentle freezing and dissected, and the shells  
179 were separated from the body tissue ~~in order~~ to calculate [the condition index according to Davenport & Chen](#)  
180 [\(1987\) \(CI = \(body weight/shell weight\) × 100\), and](#) their individual dry weights ~~and to~~ standardize respiration  
181 rates ~~to body weights~~.

182  
183 **2.5 Water temperature data.** The main forcing driver of shellfish LH inside DEB models is represented by  
184 ~~mean~~ seawater temperature (Pouvreau et al., 2006; Kearney et al., 2010; Kooijman, 2010; Sarà et al., 2011;  
185 2013). DEB simulations were run under subtidal conditions (body temperature was expressed by the mean  
186 seawater temperature; Montalto et al., 2014) with 4 years-hourly data (Jan 2006 - Dec 2009) of seawater  
187 temperature measured about 1 m below the surface at the closest meteo-oceanographic station held in Trieste  
188 (LAT 45° 38' 57.81"; LONG 13° 45' 28.58") and Palermo (LAT 38° 07' 17.08"; LONG 13° 22' 16.79"). The  
189 period of 4 years is consistent with the normal life span of most Mediterranean shellfishes (Sarà et al., 2012;  
190 2013b). Both sites were chosen as they represent two opposite temperature and food conditions for mussel  
191 growth in Italy, with Trieste as representative of lower temperature (average 16.98 ± 6.19 °C) and higher food  
192 levels (average 1.36 ± 0.37 CHL-a), and Palermo of higher temperatures (average 20.19 ± 4.64 °C) and lower  
193 food (average 0.19 ± 0.09 CHL-a). Data are available online from the Italian Institute of Environmental Research  
194 (ISPRA) web page (<http://www.mareografico.it/>).

195  
196 **2.6 CHL-a dataset.** ~~Chlorophyll a~~ (CHL-a) ~~was~~ derived from satellite imageries (µg L<sup>-1</sup>;  
197 <http://emis.jrc.ec.europa.eu/>) ~~was and~~ adopted as a reliable food quantifier for suspension feeders (Kearney et  
198 al., 2010; Sarà et al., 2011; 2012) ~~and was downloaded from the EMIS website~~ (<http://emis.jrc.ec.europa.eu/>).

Codice campo modificato

199  
200  
201 **2.7 Model description.** The Dynamic Energy Budget (DEB) Theory provides a general framework that allows  
202 to describe how physiological mechanisms are driven by temperature and food availability, and influences  
203 growth and the reproductive performances in marine organisms ([Sousa et al., 2010](#); Monaco et al., 2014; [Jusup et](#)

204 | [al., 2017](#)). Following the  $\kappa$ -rule (~~DEB theory~~; Kooijman, 2010) a fixed energy fraction ( $\kappa$ ) is allocated to growth  
205 | and somatic maintenance, while the remaining fraction ( $1-\kappa$ ) is allocated to maturity maintenance plus  
206 | maturation or reproduction. If the general environmental conditions deviates from common natural patterns (i.e.  
207 | changes in temperature, food availability etc.) reproduction and growth are consequently affected. According to  
208 | the DEB theory, a reduction in growth can be caused either by reduced food assimilation ( $\dot{p}_A$ ), enhanced  
209 | maintenance costs  $[\dot{p}_M](\dot{p}_M)$ , or enhanced growth costs ( $\dot{p}_G$ ). Using this approach, and through the DEB  
210 | parameters ~~derived from Sarà et al. (2012)~~ reported in Table 1, except for the variation in the maintenance costs  
211 |  $[\dot{p}_M](\dot{p}_M)$  and in the assimilation efficiency of food (AE) which were experimentally estimated throughout this  
212 | study, we performed simulations ~~using thea~~ standard version of the DEB model (Nisbet et al., 2010) aimed at  
213 | investigating the potential variations in growth and fecundity of our model species. To run the DEB simulations,  
214 | local thermal series of selected sites were used together with satellite CHL-a concentrations, obtaining a first  
215 | model with environmental conditions. A second model was run with the  $[\dot{p}_M](\dot{p}_M)$  calculated from the oxygen  
216 | measurements on specimens of *M. galloprovincialis* from Tanks 3-4 (pH 7.5) simulating a chronic hypercapnia  
217 | condition for the full cycle (4 years) and the relative estimated AE. Subsequently, further models were run by  
218 | simulating one random hypoxia event (~~duration = 30 days~~) for each of the four years of the cycle, then  
219 | simulating two yearly events, and so on up to six ~~monthly~~ hypoxia events. The ~~starting~~ month of each event was  
220 | randomly chosen for every year with the use of a table of random digits. The  $[\dot{p}_M](\dot{p}_M)$  calculated from the oxygen  
221 | consumption rate measurements on specimens from Tanks 7-8 (pH 7.5 and hypoxia) was used in substitution to  
222 |  $[\dot{p}_M](\dot{p}_M)$  from pH 7.5 tanks 3-4, coupled with the relative estimated AE, when simulating both stressors.  
223 | ~~Simulations were performed using the R routine for Standard DEB model developed by M. Kearney (2012), and~~  
224 | ~~further modified (for use in bivalve modelling) by Sarà et al. (2013).~~ Outputs of the DEB models (~~Sarà et al.,~~  
225 | ~~2014~~) were: the maximum theoretical total length of shellfish (TL), the maximum total weight (TW), the total  
226 | number of eggs (TRO) produced during a life-span of 4 years, the total number of reproductive events (RE) and  
227 | the time needed to reach gonadic maturity (TM) for each treatment.

228

229 | 2.7.1 Model limitation. DEB models are particularly useful to quantitatively assess the effects of multiple  
230 | stressors on LH-traits in an integrated manner, leading to test the hypothesis on how OA may affect the  
231 | maintenance costs of living organisms (Jager et al., 2016). Maintenance costs, as defined by Dynamic Energy  
232 | Budget Theory (Kooijman, 2010), represent the energy requirement of an organism to survive, excluding  
233 | investments in growth, reproduction and development. The volume-specific somatic maintenance costs

234 parameter [ $\dot{p}_M$ ] within the standard DEB model has been up to date estimated only by indirect approaches  
235 through changes in energy content by starvation over time (van der Meer, 2006) or measurements of respiration  
236 rate of starved organisms (van der Veer et al., 2006; Ren and Schiel 2008). The idea of quantitatively assess the  
237 effect of a stressor including it as a modification of a specific parameter was first introduced by Jager et al.  
238 (2016) with the *stress factor* “s” applied to assimilation, maintenance and cost of growth. Thus, after estimating  
239 the effect induced by a treatment on the oxygen consumption, in our case expressed as percentage variation, we  
240 summed/subtracted the energetic amount due to the effect of a stressor to the species-specific [ $\dot{p}_M$ ] parameter of  
241 *M. galloprovincialis* (Sarà et al. 2012) then we run our models. Previous proposed approaches, taking into  
242 account starvation for [ $\dot{p}_M$ ] estimation, wouldn’t be realistically applicable for testing and quantifying the effect  
243 of a stressor on the energy budget, without adding a further stressor. Jager et al. (2016) was therefore the first to  
244 adopt this concept, although using a simplified DEB model (DEBkiss; Jager et al. 2013) that did not involve the  
245 concepts of reserve and maturity that play a central role in DEB theory. Although this may not be considered a  
246 reliable measure of maintenance costs but a simpler proxy of metabolic effect, negligible costs for growth and  
247 gonadic development stand on the assumption of constant protein turnover throughout the experimental range  
248 (Hawkins et al. 1989).

249  
250 **2.8 Effects on shell: mechanical strength and SEM pictures.** The functional impact of exposure to pH and to  
251 validate the pH effect on morphological structure of valves, was tested on mussels exposed to the two nominal  
252 pHs for 4 weeks. Twice (week 1 and week 4), 16 mussels for each treatment were collected and dissected, and  
253 both valves were cleaned and dried with absorbent paper. The left valve was then sliced transversely using a  
254 circular saw (Dremel® 300 series) to section the whole length of the shell. Age was estimated using the analysis  
255 of shell rings proposed by Peharda et al. (2011) by counting the number of rings with the use of a stereo  
256 microscope (Leica EZ4). The right valves were instead evaluated for their ~~mechanical~~breaking properties ~~at the~~  
257 ~~Department of Mechanical Engineering. Experimental through~~ crushing tests, ~~in order to estimate the shell’s~~  
258 ~~(maximum breaking load (in N) as a further validation step, were realised with as previously done in Martinez et~~  
259 ~~al. (2018) a home-made press previously calibrated by an Instron 3367 machine controlled by the Bluehill 2.0~~  
260 ~~software.~~ The effects of low pH exposure ~~were~~was also documented by the use of a scanning electron  
261 microscope (SEM; Zeiss LEO 440) that led to a thorough investigation on the integrity of the mussels’ external  
262 protein layer (*periostracum*) and on the underlying mineral layer, rich in calcite and aragonite.

263

264 **2.9 Statistical analysis.** The assumption of normal distribution has been tested through the Anderson–Darling  
265 test using Past® software. In order to test for significant differences in respiration rate and the assimilation  
266 efficiency, ANOVAs were performed using Treatment (CTRL, Tr1, Tr2, Tr3) and Time (Week 1 and Week 4) as  
267 fixed factors, with respectively four and two levels. In order to test for significant differences in behavioural  
268 categories, ANOVAs were performed using Treatment (CTRL, Tr1, Tr2, Tr3) as fixed factors, while Breaking  
269 load was tested with Treatment (CTRL, Tr1, Tr2, Tr3) and Time (Week 1 and Week 4) as fixed factors. When  
270 significant differences were detected, the Student-Newman-Keuls (SNK) post-hoc pair wise comparison of  
271 means was used (Underwood, 1997). Cochran’s test was used prior to ANOVA to test the assumption of  
272 homogeneity of variance (Underwood, 1997). When no homogeneous variances were rendered with any type of  
273 transformation, the significance level was set at 0.01 instead of 0.05, as ANOVA can withstand variance  
274 heterogeneity, particularly in large balanced experiments, thereby reducing the possibility of a Type I error  
275 (Underwood, 1997).

276

277

### 3 Results

278 **3.1 Water chemistry.** ~~Experimental target pH values were constantly maintained at significantly different levels~~  
279 ~~in all tanks (normal pH and 7.5 pH treatments; Table 2; ANOVA,  $p < 0.01$ ; SNK test: CTRL = Tr2, Tr1 = Tr3).~~  
280 ~~Oxygen  $pO_2$  was also maintained at significantly different levels between normoxia ( $7.3 \pm 0.02$  mg/l) and~~  
281 ~~hypoxia ( $2.4 \pm 0.02$  mg/l) treatments (Table 2; ANOVA,  $p < 0.01$ ; SNK test: CTRL = Tr1, Tr2 = Tr3). This~~  
282 ~~translated into significant different  $pCO_2$  levels in all treatments (Table 2; ANOVA,  $p < 0.01$ ), and in different~~  
283  ~~$CO_3^{2-}$ ,  $Ca$  and  $Ar$  levels in all tanks (Table 2; ANOVA,  $p < 0.01$ ) except between Tr1 and Tr3 (SNK test: Tr1~~  
284 ~~= Tr3).~~

285

286 **3.2-1 Valve gaping.** During behavioural observations on *M. galloprovincialis*, specimens showed a significant  
287 difference in the behavioural categories, showing respectively  ~~$64.5 \pm 5.6$  % (CTRL),  $57.3 \pm 0.2$  (Tr1),  $24.5 \pm 0.3$~~   
288 ~~(Tr2) and  $12.7 \pm 0.2$  % (Tr3) of opened valves (Fig. 1; Table 3, ANOVA,  $p < 0.001$ ). The percentage of closed~~  
289 ~~valves was instead  $35.5 \pm 5.6$  % (CTRL),  $42.7 \pm 4.8$  (Tr1),  $75.5 \pm 5.7$  (Tr2) and  $87.3 \pm 3.1$  % (Tr3) (ANOVA,  $p <$~~   
290  ~~$0.001$ ),  $33.3 \pm 11.2$  (CTRL),  $50 \pm 4.5$  (Tr1),  $80 \pm 8.9$  (Tr2) and  $83.3 \pm 6.1$  of opened valves (Fig. 1; Table 3,~~  
291 ~~ANOVA,  $p < 0.001$ ). The percentage of closed valves can be easily calculated as  $100 - \text{open valves}$ . No~~  
292 ~~significant differences resulted between week 1 and 4 (ANOVA,  $p > 0.05$ ), between CTRL and Tr1 and between~~  
293 ~~Tr2 and Tr3.~~

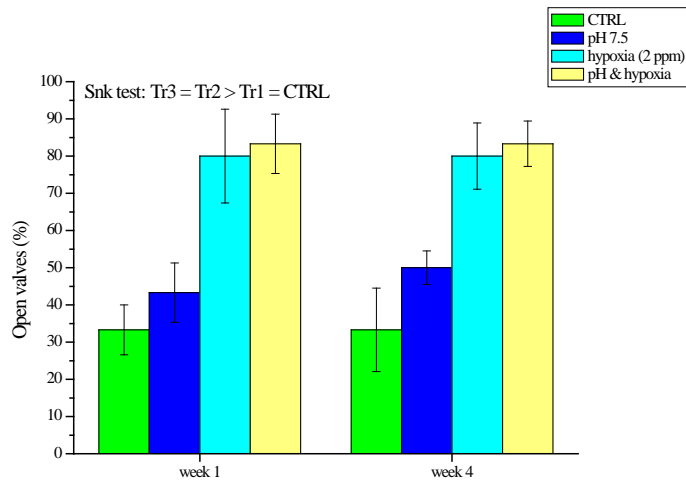

294

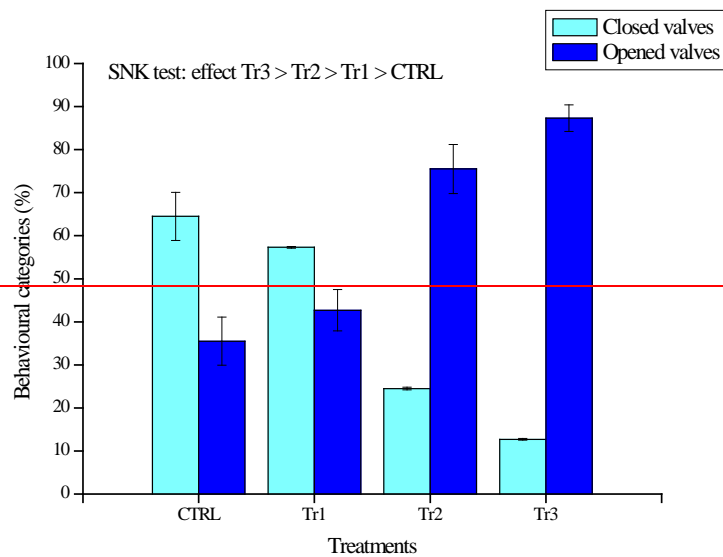

295

296

297

298

299

Fig. 1 Behavioural observations ( $\pm$  se) of *Mytilus galloprovincialis* under different treatments of oxygen (normoxia – hypoxia 2ppm) and pH (7.5 – 8.0). The two behavioural categories represented were: closed and opened valves.

300

301

302

**3.3-2 Oxygen consumption.** Results showed a significant reduction in the oxygen consumption rate by specimens of *M. galloprovincialis* exposed to treatments (Table 4, ANOVA,  $p < 0.01$ ), although the SNK test revealed no significant differences among the various groups (Fig. 2a). No significant effects were highlighted



303 for the time factor (Table 4, ANOVA,  $p > 0.05$ ), so in Fig. 2a we reported only results for week 4. The rate of  
 304 oxygen consumption was reduced by up to 42% in Tr1, to 35% in Tr2, and to 41% in Tr3, causing a decrease in  
 305 the  $[D_M]_{PM}$  by up to 29% in Tr1, to 47% in Tr2, and to 49% in Tr3 across the four weeks of exposure.  
 306

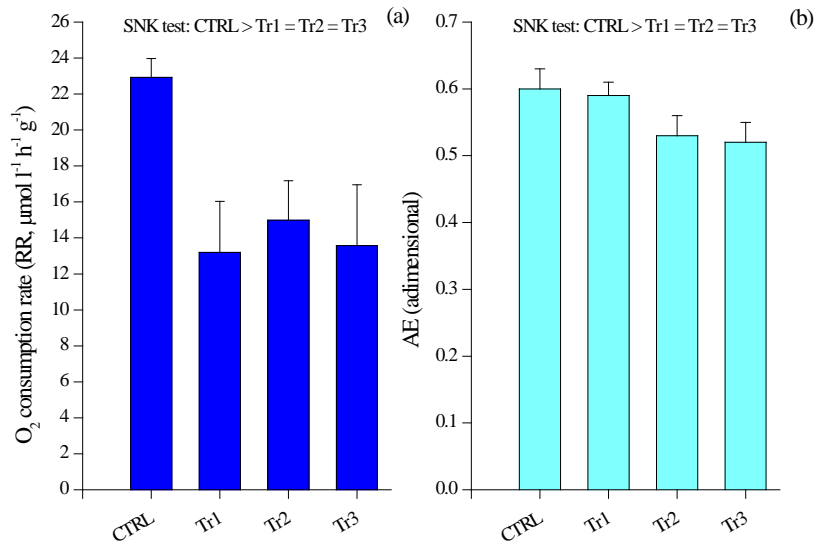

307  
 308 Fig. 2 (a) Oxygen consumption rates (RR) and (b) Assimilation efficiency (AE)  $\pm$  se of *Mytilus galloprovincialis*  
 309 under different treatments of oxygen (normoxia – hypoxia 2ppm) and pH (7.5 – 8.0) at week 4. CTRL = control;  
 310 Tr1 = pH 7.5; Tr2 = hypoxia 2ppm; Tr3 = pH 7.5 & hypoxia 2ppm.  
 311

312 **3.4-3 Assimilation efficiency.** Assimilation efficiency of food (AE) ~~resulted was in~~ significantly affected by  
 313 treatments (Table 4, ANOVA,  $p < 0.001$ ) after four weeks of exposure. No significant effects were highlighted  
 314 for the time factor (Table 4, ANOVA,  $p > 0.05$ ), so in Fig. 2b were reported only results for week 4. In  
 315 particular, AE decreased of 2.4% in Tr1, of 12.4% in Tr2, and of 14.4% in Tr3, although the SNK test revealed  
 316 no significant differences among ~~the various groups~~ treatments (Fig. 2b). At the end of the 4 weeks exposure, the  
 317 BCI resulted comparable ( $35.16 \pm 1.12 \%$ ) to the initial values ( $39 \pm 1.9 \%$ ).  
 318

319 **3.5-4 DEB simulation results.** Once  $[D_M]_{PM}$  and AE were experimentally estimated under each treatment, we  
 320 introduced obtained those parameters were used values under the different treatments to run DEB models and to  
 321 obtain the derived in order to predict the effects in on in terms of LH traits. Thus, ~~we performed~~ DEB simulations

322 were performed under local thermal conditions (as expressed by the thermal series recorded in Trieste and  
323 Palermo; see ~~M&M for details~~Section 2.5) and using satellite CHL-a concentrations (2006-2009) as a proxy of  
324 food. Results showed a remarkable effect exerted by hypercapnia and an increasing ~~addictive effect~~ hypoxia  
325 contribution of hypoxia related to the intensity of disturbance (*i.e.* number ~~of yearly~~ hypoxic events per year) on  
326 LH traits of *M. galloprovincialis* by the end of 4<sup>th</sup> year (Table 5). Total length (TL) and total weight (TW) in  
327 Trieste and in Palermo were similarly reduced by hypercapnia (Fig. 3), with a progressive additive effect of  
328 hypoxia (Table 5). Total length (TL) resulted unaffected by hypoxia up to a frequency of 2 hypoxia events ( $f =$   
329 0.17; 1/Time), then the Trieste site (representative of eutrophic conditions) reported a larger~~higher~~ effect. On  
330 the opposite the total weight (TW) highlighted a larger~~higher~~ effect of hypoxia on the oligotrophic site  
331 (Palermo) (Fig. 4). The total number of eggs produced (TRO) and the total number of reproductive events (RE)  
332 in Trieste were strongly reduced by hypercapnia (Fig. 3), with the same progressive ~~addictive effect from~~  
333 hypoxia contribution (Table 5). Maturation time (TM) was affected both in Trieste and Palermo by hypercapnia,  
334 with the same hypoxia contribution previously shown. Palermo showed no reproductive events in the DEB  
335 simulations.

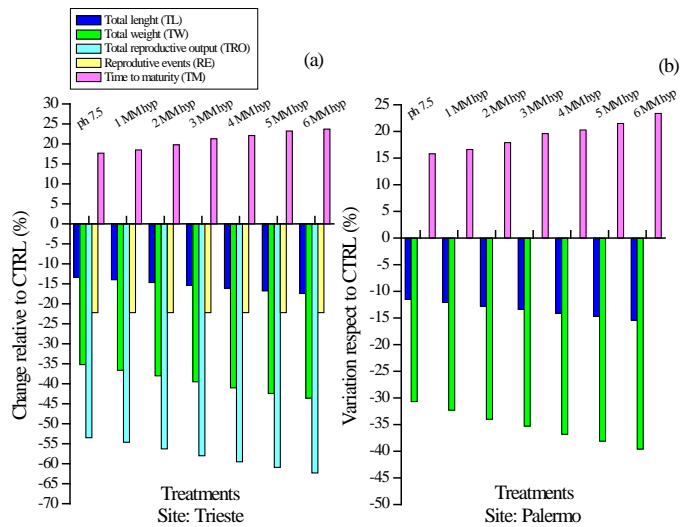

336

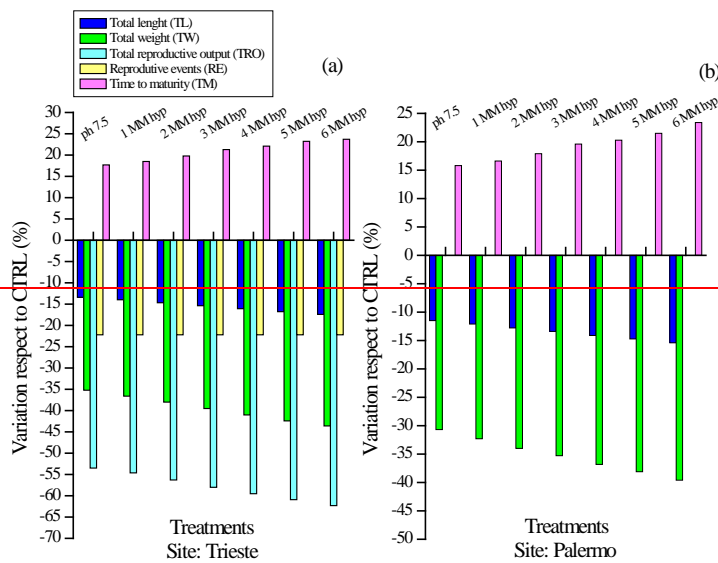

337

338 Fig. 3 Results from DEB simulation for (a) Trieste and (b) Palermo sites, percentage variation of DEB outputs  
 339 respect to CTRL. TL and TW were reduced by 13.4% and 35.2% in Trieste, and by 11.5% and 30.7% in Palermo  
 340 by hypercapnia, with a progressive additive hypoxia effect up to 8.9%. TRO and RE were reduced by 53.4%  
 341 and 66.7% in Trieste by hypercapnia, with a progressive additive hypoxia effect up to 8.8%. TM increased by  
 342 17.8% in Trieste and by 15.7% in Palermo with a similar hypoxia effect (up to 7.6%).

343

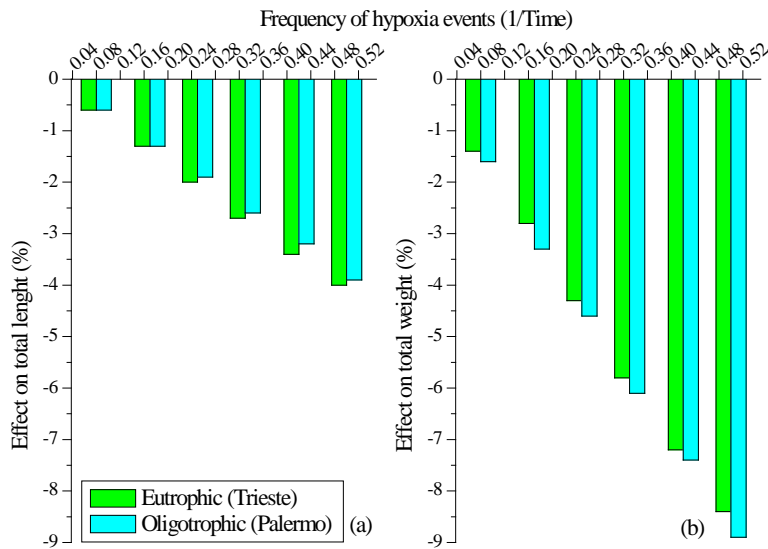

Codice campo modificato

344

345 [Fig. 4 Percentage effect of Hypoxia from DEB simulations on TL and TW considering the two different trophic](#)  
346 [conditions represented by Trieste \(a\) and Palermo \(b\).](#)

347

348 **3.6 Effects on shell.** *Specimens of M. galloprovincialis collected ranged in age from 1 to 3 years with a mean*  
349 *age of  $1.8 \pm 0.04$  years ( $n = 128$ ). Overall, 97% of individuals were  $> 2$  years old.* Results from the breaking load  
350 experiment revealed a significant effect of pH ( $58.8 \pm 5$  N) and of combined stressors on the breaking load ( $50 \pm$   
351  $2.7$  N), compared to hypoxic ( $64.4 \pm 3.7$  N) and CTRL specimens ( $77.2 \pm 2.2$  N) (Fig. 45) (Table 3, ANOVA,  $p$   
352  $< 0.001$ ). In addition, the effect was stronger at week 4 than after one week of exposure (Table 3, ANOVA,  $p <$   
353  $0.01$ ). Deeper investigations through scanning electron microscopy validated an effect by showing an increasing  
354 erosion of the shell after exposure to  $\text{CO}_2$ -induced acidification. The external dissolution pattern usually started  
355 from the umbonal region and progressed toward the margin of the shell, usually associated with some degree of  
356 damage to the *periostracum*. The damage was present at differing extensions in all specimens exposed to  
357 treatments, except in the control mussels (Fig. 5-6 b, c, d). The alteration of the underlying carbonate layer was  
358 instead visible only in Tr1 and Tr3, with details in Fig. 6-7 (b, d). This kind of alteration was never recorded  
359 observed under control pH (Fig. 4a).

360

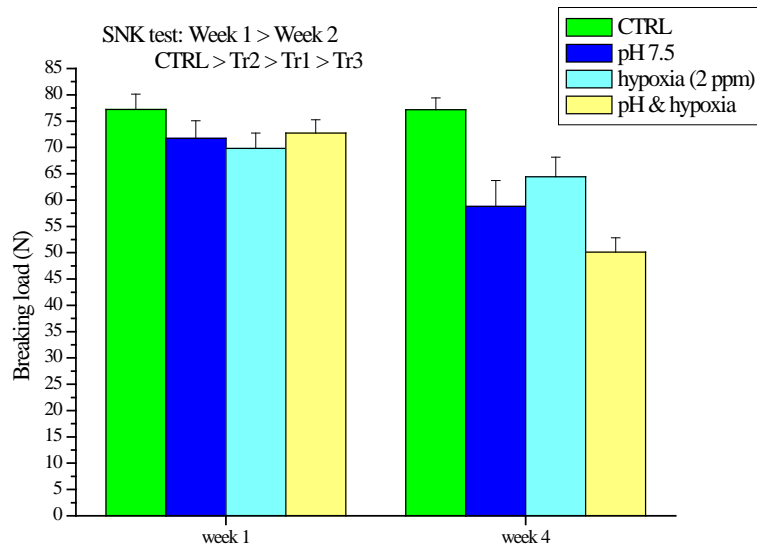

361  
362 Fig. 4-5 Breaking load of valves (in Newton,  $N \pm se$ ) exposed to different treatments of oxygen (normoxia –  
363 hypoxia 2ppm) and pH (7.5 – 8.0) at week 1 and 4.

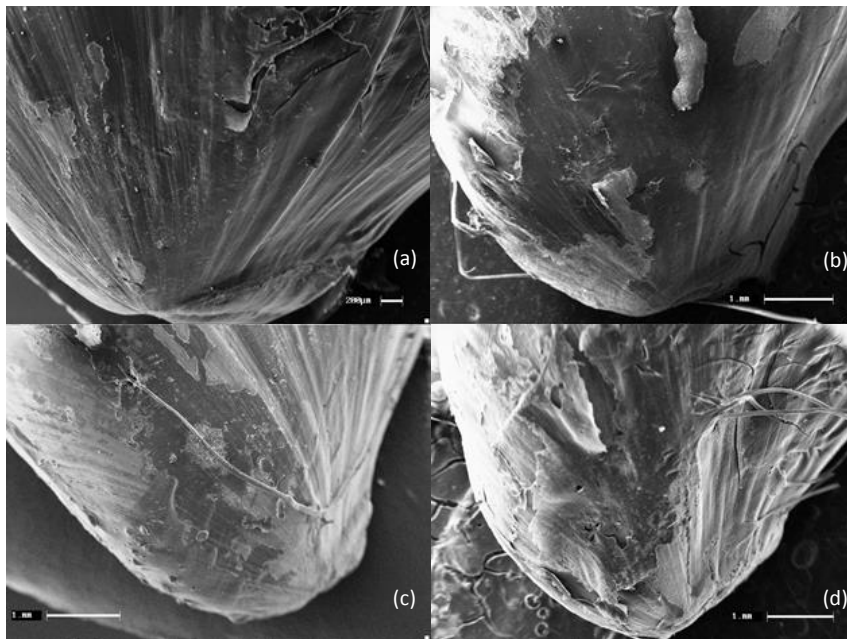

364  
365 Fig. 5-6 SEM pictures of different shells exposed to (a) control condition (CTRL); (b) pH 7.5 and normoxia  
366 condition (Tr1); (c) normal pH and hypoxia condition (Tr2); (d) both pH 7.5 and hypoxia conditions (Tr3).  
367

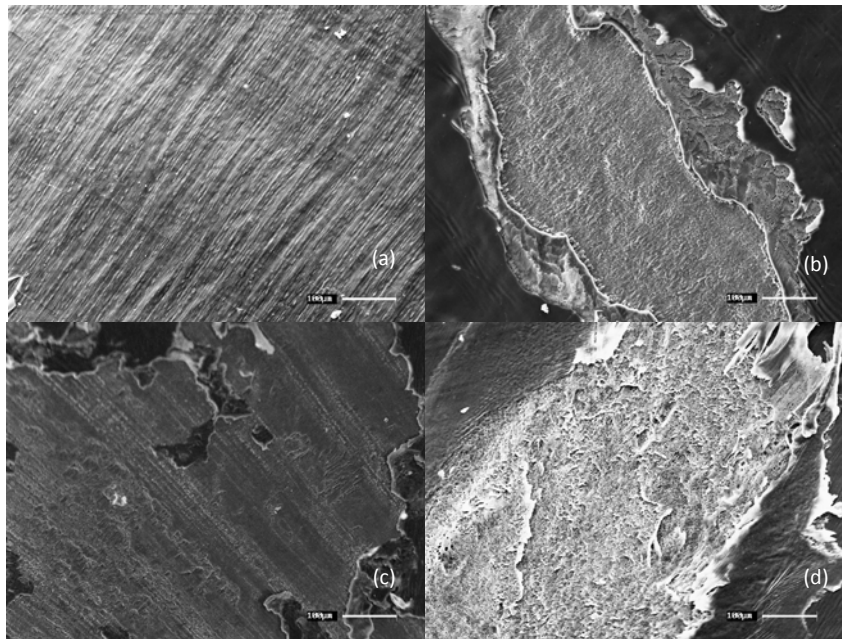

368  
 369 | Fig. 6-7 Details of different shells exposed to (a) control condition (CTRL); (b) pH 7.5 and normoxia condition  
 370 | (Tr1); (c) normal pH and hypoxia condition (Tr2); (d) both pH 7.5 and hypoxia conditions (Tr3).

371 |  
 372 |

#### 4 Discussion

373 | Marine organisms, and in particular intertidal species (Montecinos et al., 2009), have been ~~formally~~-recognized as  
 374 | being equipped with well-developed and conserved ~~compensatory~~-mechanisms to ~~contrast-compensate~~ ocean  
 375 | acidification such as (i) passive buffering of intra- and extracellular fluids; (ii) transport and exchange of relevant  
 376 | ions; (iii) transport of CO<sub>2</sub> in the blood in those species that have respiratory pigments; (iv) metabolic suppression  
 377 | to wait out periods of elevated CO<sub>2</sub> (e.g. Lindinger et al., 1984; Cameron, 1989; Walsh and Milligan, 1989; Hand,  
 378 | 1991; Heisler, 1993; Guppy and Withers, 1999; Pörtner et al., 2004). Several authors recorded ~~suppression~~~~ed~~ of  
 379 | feeding activity and growth, depressed metabolism, increased N excretion and loss of tissue weight for marine  
 380 | bivalves exposed to reduced seawater pH (Bamber, 1990; Michaelidis et al., 2005; Berge et al., 2006; Gazeau et  
 381 | al., 2010). Bivalves are in fact capable of maintaining a constant internal pH by decreasing their metabolic rates  
 382 | and/or dissolving their shell; the shell acting then as a source of CO<sub>3</sub><sup>2-</sup> (Bamber, 1990; Michaelidis et al., 2005;  
 383 | Berge et al., 2006) counterbalancing the ~~erossing~~-effect ~~due-to-loweringof~~ dissolved CO<sub>2</sub> ~~crossingthrough~~  
 384 | biological membranes (~~Fabry et al., 2008~~). Compensation of low pH, ~~associated with anthropogenic increases in~~  
 385 | ~~seawater pCO<sub>2</sub> (Fabry et al., 2008)~~, through adjustments in ionic composition appears to be a trade-off that is not  
 386 | likely sustainable ~~on-over~~ longer time-scales, ~~such as that associated with anthropogenic increases in seawater~~

387 ~~pCO<sub>2</sub> (Fabry et al., 2008) From our behavioural observations mussels exposed to low pH resulted in a higher, even~~  
388 ~~if not significant, percentage of opened valves respect to CTRL individuals, with the highest significant difference~~  
389 ~~relative to hypoxia exposition. The effect of low pH on the adductor muscle of bivalves has been already~~  
390 ~~documented by Pynnönen & Huebner (1995) and the same effect has been reported after exposition to hypoxia~~  
391 ~~(Sheldon & Walker 1989).~~ In agreement with current literature showing deleterious effects of CO<sub>2</sub>-induced  
392 acidification on a wide range of invertebrates (Barnhart & McMahon, 1988; Barnhart, 1989; Rees & Hand, 1990),  
393 and similarly to other studies by *M. galloprovincialis* (Gestoso et al., 2016; Michaelidis et al., 2005), our results  
394 showed how hypercapnia (pH reduced by 0.6 units, relative to the natural pH of the lower Tyrrhenian waters) was  
395 able to induce a decline in metabolic rates of mussels. This kind of decline has already been noticed by other  
396 authors as an adaptive strategy for survival under transiently stressful conditions (Michaelidis et al., 2005).  
397 According to Pörtner et al. (2004), metabolic reduction due to hypercapnia could be a result of acid-base  
398 disturbances and therefore be similar to the response of intertidal individuals to anaerobic conditions. Direct  
399 effects of hypoxemia have been further proven to cause fatal decrements in an organism's performance in growth,  
400 reproduction, feeding, immunity and behaviour (*sensu* Pörtner & Farrell, 2008). ~~Synergistic Combined effects by~~  
401 ~~stressors like such as~~ ocean acidification and hypoxia ~~narrow are capable of narrowing~~ the thermal window of  
402 functioning according to species-specific sensitivities, modulating biogeographical ~~distributionses~~, coexistence  
403 ranges, community shifts and ~~in general ecological~~ other interactions (Pörtner & Farrell, 2008). The mussel *Mytilus*  
404 *edulis* has been proven able to compensate both short- and long-term exposure to hypercapnia by dissolution of ~~its~~  
405 shells (Lindinger et al., 1984; Michaelidis et al., 2005), resulting in reduced growth and metabolism. A similar  
406 mechanism of release of inorganic molecules into the pallial cavity (as CaCO<sub>3</sub> from valves) has been documented  
407 during periods of anaerobic metabolism, to maintain the acid-base balance (Chaparro et al., 2009), determining  
408 further physiological and energetic cost such as decreased growth, respiration rate and protein synthesis (Pörtner et  
409 al., 2005). During periods of environmental oxygen limitation, many organisms are able to suppress ATP demand,  
410 shut down expensive processes, such as protein synthesis (Hand, 1991), but at the same time limiting growth and  
411 ~~the~~ reproductive potential. Although suppression of metabolism under short-term experimental conditions is a  
412 ~~“sub-lethal”~~ reversible process, reductions in growth and reproductive output will effectively diminish the survival  
413 of the species on longer time-scales (Fabry et al., 2008). The contemporary occurrence in our simulations, of  
414 monthly hypoxia events, revealed a growing ~~additive~~ contribution to what was already elicited by hypercapnia  
415 ~~alone~~ on growth and reproduction. Current literature has not currently explored the combined effects of multiple  
416 stressors on long-term experiments by modulating the intensity and duration of disturbance. This would probably

417 translate as a very complex experimental set-up which would be hardly practicable, especially on long-term scales.

418 On the other hand, mechanistic models offer a more ~~sustainable and reliable~~ practical alternative to long-term, in-

419 field research when studying the effects of multiple-stressors-, with the advantage of testing, at the same time, the

420 magnitude and the duration of disturbance on LH\_-traits of a model species. Our results highlighted the general

421 hypoxia growing effect following the increasing duration of disturbance, with a particular focus in Trieste on TW

422 and TRO, while in Palermo on TW and TM (~~Table 5~~ Fig. 3). A further important peculiarity of the ~~DEB~~

423 mechanistic modelling simulations—deals with the possibility to spatially contextualise the effects of single and

424 multiple stressors on selected outputs by integrating local thermal conditions and food concentrations (Sarà et al.

425 2018c). Comparing the effect of hypoxia across frequencies (Fig. 4), total length (TL) resulted unaffected up to a

426 frequency of 2 hypoxia events in both sites, then the highest effect was recorded in the eutrophic site (Trieste).

427 Trieste, between the two chosen sites, had represented also the one with the lowest temperature. On the contrary a

428 lower-smaller effect of hypoxia was detected ~~resulted considering on the total weight (TW) in the eutrophic~~

429 ~~site Trieste, suggesting some a sort of food compensation capacity on the effect of environmental stressor~~

430 (Mackenzie et al., 2014). ~~In particular~~ Also the DEB model easily allowed the estimation of the fecundity potential

431 of ~~cultivated and natural~~ organisms, that is often omitted in other ecological studies, but that represents a crucial

432 quantity for resource (e.g. aquaculture) (Sarà et al. 2018c) and conservation purposes. To verify impacts on

433 shellfish fecundity, we contextualised our simulation by introducing Trieste hourly temperature series after those

434 of Palermo, with the respective local actual CHL-a concentrations, as long as in the first site no reproductive

435 events came out from our simulations, probably due to food limitations and temperature threshold. This is

436 reflected by natural populations in Palermo colonising being represented only in only substrates in highly trophic-

437 enriched areas/sites. A combined effect of the simultaneous stressors, such as those considered across this study,

438 has proven in the present study, through our experimental and mechanistic integrated approach, to affect the

439 organism's performance in growth, reproduction and behaviour. Our results highlighted an effect of pH alone and

440 when combined with hypoxia on the breaking load of shells of our experimental mussels. Through a similar

441 approach, Martinez et al. (2018) showed that temperature was a primary factor driving shell's fragility along a

442 latitudinal gradient. Present findings corroborates that idea that fragility can be affected by both stressors through a

443 combined effect. Multiple stressors ~~Those specific and synergic effects of each stressor seem capable~~ can narrow,

444 especially ~~at~~ when organisms are on the edge of their thermal tolerance range ~~extreme temperatures, of narrowing~~

445 the thermal windows and this has a potential for generating repercussions on ,modulating biogeographical

446 distribution, coexistence ranges, community shifts, food webs and species interactions (*sensu* Pörtner & Farrell,



447 2008). Moreover, an appropriate knowledge of species' biological traits, and a mechanistic understanding of the  
448 effect of each stressor, reached through an FT-based approach, will allow the translation of the effects of  
449 environmental change into realistic management measures taking into account the optimisation of the species'  
450 biological traits (Sarà et al. 2018a,b).

451

## 452 **6 Conclusions**

453 Additional research is still required to improve our knowledge of organismal response to multiple stressors, in  
454 particular, of many marine ectotherms with indeterminate growth amongst invertebrates (e.g. crustaceans,  
455 molluscs). Nevertheless, modelling the growth and reproductive potential (and failure) of species vulnerable to  
456 those stressors with predictive tools, such as bioenergetic models is a useful approach for management and  
457 protection purposes, but also for shellfish culture in general.

458

## 459 **Authors' contributions**

460 ~~Both authors contributed to all phases of this ms. AG and GS conceived the idea and led the writing. AG carried~~  
461 ~~out all experiments in mesocosms, performed modelling work and analysed data. GS provided lab facilities and~~  
462 ~~research funds. All authors contributed critically to the drafts and gave final approval for publication.~~

463

## 464 **Acknowledgements**

465 PRIN TETRIS 2010 grant n. 2010PBMAXP\_003, funded to GSARA by the Italian Minister of Research and  
466 University (MIUR) supported this research. The authors declare that they have no conflict of interest. We thank  
467 and are especially grateful to all collaborators involved in this paper, in particular to ~~Dr.~~ Alessandro Rinaldi,  
468 Matteo Mercurio and Marco Martinez for their technical support. ~~We also thank~~ Francesco Furnari for the use of  
469 the scanning electron microscope. ~~We deeply thanks~~ and Ms. Jan Underwood for the fine-tuning of the English.

470 **References**

- 471 Ameyaw-Akumfi, C., & Naylor E. (1987). Temporal patterns of shell-gape in *Mytilus edulis*. *Marine Biology*,  
472 95,237-242.
- 473 Appelhans, Y., Thomsen, J., Pansch, C., Melzner, F., & Wahl, M. (2012). Sour times: seawater acidification  
474 effects on growth, feeding behaviour and acid–base status of *Asterias rubens* and *Carcinus maenas*. *Marine*  
475 *Ecology Progress Series*, 459,85-98.
- 476 Bamber, R. N. (1990). The effects of acidic seawater on 3 species of lamellibranch mollusc, *Journal of*  
477 *Experimental Marine Biology and Ecology*, 143,181–191.
- 478 Barnhart, M. C. (1989). Respiratory acidosis and metabolic depression in dormant invertebrates. In: Malan A,  
479 Canguilhem B (eds) *Living in the cold. Colloque INSERM/John Libbey Eurotext*, London, p 315–401.
- 480 Barnhart, M. C., McMahon, B. R. (1988). Depression of aerobic metabolism and intracellular pH by hypercapnia  
481 in land snails, *Otala lactea*. *Journal of Experimental Biology*, 138,289–299.
- 482 Beniash, E., Ivanina, A., Lieb, N. S., Kurochkin, I., Sokolova, I. M. (2010). Elevated level of carbon dioxide  
483 affects metabolism and shell formation in oysters *Crassostrea virginica*. *Marine Ecology Progress Series*,  
484 419,95–108.
- 485 Berge, J. A., Bjerkgeng, B., Pettersen, O., Schaanning, M. T., and Oxnevad, S. (2006). Effects of increased sea  
486 water concentrations of CO<sub>2</sub> on growth of the bivalve *Mytilus edulis* L. *Chemosphere*, 62,681–687.
- 487 Bozinovic, F., Calosi, P., Spicer, J. I. (2011). Physiological correlates of geographic range in animals. *Annual*  
488 *Review of Ecology Evolution and Systematics*, 42,155–179.
- 489 [Braby, C. E., & Somero, G. N. \(2006\). Following the heart: temperature and salinity effects on heart rate in](#)  
490 [native and invasive species of blue mussels \(genus \*Mytilus\*\). \*Journal of Experimental Biology\*, 209,2554-2566.](#)
- 491 Buckley, L. B., Hurlbert, A. H., and Jetz, W. (2012). Broad-scale ecological implications of ectothermy and  
492 endothermy in changing environments. *Global Ecology and Biogeography*, 21,873-885.
- 493 Byrne, M. (2012). Global change ecotoxicology: identification of early life history bottlenecks in marine  
494 invertebrates, variable species responses and variable experimental approaches. *Marine Environmental*  
495 *Resources*, 76,3–15.
- 496 Cameron, J. N. (1989). *The Respiratory Physiology of Animals*. Oxford University Press, New York. 353 pp.
- 497 Carrington, E., Waite, J. H., Sarà, G., and Sebens, K. P. (2015). Mussels as a model system for integrative  
498 ecomechanics. *Annual Review of Marine Science*, 7,443-469.

499 Chaparro, O. R., Montory, J. A., Segura, C. J., Pechenik, J. A. (2009). Effect of reduced pH on shells of brooded  
500 veligers in the estuarine bivalve *Ostrea chilensis* Philippi 1845. *Journal of Experimental Marine Biology and*  
501 *Ecology*, 377,107–112.

502 Connell, S.D., Doubleday, Z. A., Hamlyn, S. B., Foster, N. R., Harley, C. D., Helmuth, B., ... & Russell, B. D.  
503 (2017). How ocean acidification can benefit calcifiers. *Current Biology*, 27,R95-R96.

504 [Conover, R.J. \(1966\). Assimilation of organic matter by zooplankton, \*Limnol. Ocean.\* 11:338–354](#)

505 Denny, M., & Benedetti-Cecchi, L. (2012). Scaling up in ecology: mechanistic approaches. *Annual Review of*  
506 *Ecology, Evolution, and Systematics*, 43,1-22.

507 Denny, M., & Helmuth, B. (2009). Confronting the physiological bottleneck: a challenge from ecomechanics.  
508 *Integrative and Comparative Biology*, 49,197-201.

509 Díaz S & Cabido, M. (2001). Vive la difference: plant functional diversity matters to ecosystem processes.  
510 *Trends in ecology & evolution*, 16,646-655.

511 Dickson, A. G., Millero, F. J. (1987). A comparison of the equilibrium constants for the dissociation of carbonic  
512 acid in seawater media. *Deep-Sea Research*, 34,1733–1743.

513 Duquette, A. M., McClintock, J. B., Amsler, C. D., Perez-Huerta, A., Hall-Spencer, J. M., & Milazzo, M. (2015).  
514 Effects of reduced pH on shell mineral composition and integrity of three common gastropods from a natural  
515 undersea CO<sub>2</sub> vent community off Vulcano Island, Italy. *Integrative and Comparative Biology*, 55,E50-E50.

516 Ezgeta-Balic, D., Rinaldi, A., Peharda, M., Prusina, I., Montalto, V., Niceta, N., Sarà, G. (2011). An energy  
517 budget of the subtidal bivalve, *Modiolus barbatus* (Mollusca) at different temperatures. *Marine Environmental*  
518 *Research*, 71,79-85.

519 Fabry, V. J., Seibel, B. A., Feely, R. A. & Orr, J. C. (2008). Impacts of ocean acidification on marine fauna and  
520 ecosystem processes. *ICES Journal of Marine Science: Journal du Conseil*, 65,414-432.

521 Feely, R. A., Sabine, C. L., Lee, K., Berelson, W., Kleypas, J., Fabry, V.J., & Millero, F. J. (2004). Impact of  
522 anthropogenic CO<sub>2</sub> on the CaCO<sub>3</sub> system in the oceans. *Science*, 305,362-366.

523 [Fields, P. A., Zuzow, M. J., & Tomanek, L. \(2012\). Proteomic responses of blue mussel \(\*Mytilus\*\) congeners to](#)  
524 [temperature acclimation. \*Journal of Experimental Biology\*, 215, 1106-1116.](#)

525 Gazeau, F., Gattuso, J. P., Dawber, C., Pronker, A. E., Peene, F., Peene, J., ... & Middelburg, J. J. (2010). Effect  
526 of ocean acidification on the early life stages of the blue mussel (*Mytilus edulis*). *Biogeosciences*, 7,2051–2060.

527 Gazeau, F., Parker, L. M., Comeau, S., Gattuso, J. P., O'Connor, W. A., Martin, S., ... & Ross, P. M. (2013).  
528 Impacts of ocean acidification on marine shelled molluscs. *Marine Biology*, 160,2207-2245.

529 Gestoso, I., Arenas, F., & Olabarria, C. (2016). Ecological interactions modulate responses of two intertidal  
530 mussel species to changes in temperature and pH. *Journal of Experimental Marine Biology and Ecology*,  
531 474,116-125.

532 Guppy, M., and Withers., P. (1999). Metabolic depression in animals: physiological perspectives and  
533 biochemical generalizations. *Biological Reviews*, 74,1-40.

534 Hall-Spencer, J. M., Rodolfo-Metalpa, R., Martin, S., Ransome, E., Fine, M., Turner, S. M., ...& Buia, M. C.  
535 (2008). Volcanic carbon dioxide vents show ecosystem effects of ocean acidification. *Nature*, 454,96-99.

536 Hand, S. C. (1991). Metabolic dormancy in aquatic invertebrates. In *Advances in Comparative and*  
537 *Environmental Physiology*, Vol. 8, pp. 1-50. Ed. by R. Gilles. Springer-Verlag, Heidelberg.

538 [Hawkins, A. J. S., Widdows, J., & Bayne, B. L. \(1989\). The relevance of whole-body protein metabolism to](#)  
539 [measured costs of maintenance and growth in \*Mytilus edulis\*. \*Physiological Zoology\*, 62, 745-763.](#)

540 Heisler, N. (1993). Acid-base regulation. In *The Physiology of Fishes*, pp. 343-377. Ed. by D. H. Evans. CRC  
541 Press, Boca Raton, FL.

542 Helmuth, B. S. (1998). Intertidal mussel microclimates: predicting the body temperature of a sessile invertebrate.  
543 *Ecological Monographs*, 68,51-74.

544 Helmuth, B., Yamane, L., Lalwani, S., Matzelle, A., Tockstein, A., & Gao, N. (2011). Hidden signals of climate  
545 change in intertidal ecosystems: what (not) to expect when you are expecting. *Journal of Experimental Marine*  
546 *Biology and Ecology*, 400,191-199.

547 Holling, C. S. (1959). Some characteristics of simple types of predation and parasitism. *Canadian Entomology*  
548 91,385-398.

549 IPCC 2014. *Climate Change 2014: Impacts, Adaptation, and Vulnerability. Part A: Global and Sectoral Aspects.*  
550 *Contribution of Working Group II to the Fifth Assessment Report of the Intergovernmental Panel on Climate*  
551 *Change*. Cambridge: Cambridge University Press.

552 [Jager, T., Martin, B. T., & Zimmer, E. I. \(2013\). DEBKiss or the quest for the simplest generic model of animal](#)  
553 [life history. \*Journal of theoretical biology\*, 328, 9-18.](#)

554 [Jager, T., Ravagnan, E., & Dupont, S. \(2016\). Near-future ocean acidification impacts maintenance costs in sea-](#)  
555 [urchin larvae: Identification of stress factors and tipping points using a DEB modelling approach. \*Journal of\*](#)  
556 [Experimental Marine Biology and Ecology, 474:11-17.](#)

557 Jørgensen, C. B., Larsen, P. S., Møhlenberg, F., & Riisgård, H. U. (1988). The mussel pump: properties and  
558 modelling. *Marine Ecology Progress Series*, 45,205-216.

559 [Jusup, M., Sousa, T., Domingos, T., Labinac, V., Marn, N., Wang, Z., & Klanjšček, T. \(2017\). Physics of](#)  
560 [metabolic organization. \*Physics of life reviews\*, 20, 1-39.](#)

561 [Kearney M \(2012\). Metabolic theory, life history and the distribution of a terrestrial ectotherm. \*Functional\*](#)  
562 [Ecology, 26: 167–179](#)

563 Kearney, M., & Porter, W. (2009). Mechanistic niche modelling: combining physiological and spatial data to  
564 predict species' ranges. *Ecology letters*, 12,334-350.

565 Kearney, M. R., Simpson, S. J., Raubenheimer, D., Helmuth, B. (2010). Modelling the ecological niche from  
566 functional traits. *Philosophical Transactions of the Royal Society B: Biological Sciences* 365,3469–3483.

567 Kearney, M. R., Matzelle, A., & Helmuth, B. (2012). Biomechanics meets the ecological niche: the importance  
568 of temporal data resolution. *Journal of Experimental Biology*, 215,922-933.

569 [Kittner, C., & Riisgård, H. U. \(2005\). Effect of temperature on filtration rate in the mussel \*Mytilus edulis\*: no](#)  
570 [evidence for temperature compensation. \*Marine Ecology Progress Series\*, 305,147-152.](#)

571 Koehl, M. A. R. (1989). Discussion: from individuals to populations. *Perspectives in ecological theory*, 39-53.

572 Kooijman, S. A. L. M. (2010). *Dynamic energy budget theory for metabolic organisation*, 3rd ed. Cambridge  
573 University Press, Cambridge.

574 Krebs, J. R., & Davies, N. B. (1993). *An Introduction to Behavioural Ecology*. Blackwell Scientific Publication,  
575 Oxford.

576 [Kroeker, K. J., Gaylord, B., Hill, T. M., Hosfelt, J. D., Miller, S. H., & Sanford, E. \(2014\). The role of](#)  
577 [temperature in determining species' vulnerability to ocean acidification: a case study using \*Mytilus\*](#)  
578 [galloprovincialis. \*PloS one\* 9:e100353.](#)

579 Kurihara, H., Matsui, M., Furukawa, H., Hayashi, M., & Ishimatsu, A. (2008). Long-term effects of predicted  
580 future seawater CO<sub>2</sub> conditions on the survival and growth of the marine shrimp *Palaemon pacificus*. *Journal of*  
581 *Experimental Marine Biology and Ecology*, 367,41-46.

582 Lewis, E., Wallace, D. (1998). Program developed for CO<sub>2</sub> system calculations. ORNL/CDIAC.

583 Lika, K., Kearney, M. R., Freitas, V., van der Veer, H. W., van der Meer, J., Wijsman, J. W., ... & Kooijman, S.  
584 A. (2011). The “covariation method” for estimating the parameters of the standard Dynamic Energy Budget  
585 model I: philosophy and approach. *Journal of Sea Research*, 66,270-277.

586 Lindinger, M. I., Lauren, D. J., and McDonald., D. G. (1984). Acid-base balance in the sea mussel, *Mytilus*  
587 *edulis*. III. Effects of environmental hypercapnia on intra- and extracellular acid-base balance. *Marine Biology*  
588 *Letters* 5,371–381.

Formattato: Italiano (Italia)

589 [Martinez, M., Mangano, M. C., Maricchiolo, G., Genovese, L., Mazzola, A., & Sarà, G. \(2018\). Measuring the](#)  
590 [effects of temperature rise on Mediterranean shellfish aquaculture. \*Ecological Indicators\*, 88, 71-78.](#)

591 [Mackenzie, C. L., Ormondroyd, G. A., Curling, S. F., Ball, R. J., Whiteley, N. M., & Malham, S. K. \(2014\).](#)  
592 [Ocean warming, more than acidification, reduces shell strength in a commercial shellfish species during food](#)  
593 [limitation. \*PLoS One\*, 9,e86764.](#)

594 Melzner, F., Stange, P., Trübenbach, K., Thomsen, J., Casties, I., Panknin, U., ... & Gutowska, M. A. (2011).  
595 Food supply and seawater pCO<sub>2</sub> impact calcification and internal shell dissolution in the blue mussel *Mytilus*  
596 *edulis*. *Plos one*, 6,e24223.

597 Michaelidis, B., Ouzounis, C., Paleras, A., & Pörtner, H. O. (2005). Effects of long-term moderate hypercapnia  
598 on acid-base balance and growth rate in marine mussels *Mytilus galloprovincialis*. *Marine Ecology Progress*  
599 *Series* 293,109–118.

600 Monaco, C. J., Wetthey, D. S., & Helmuth, B. (2014). A dynamic energy budget (DEB) model for the keystone  
601 predator *Pisaster ochraceus*. *PLoS One*, 9,e104658.

602 Montalto, V., Palmeri, V., Rinaldi, A., Kooijman, S. A. L. M., & Sarà, G. (2014). Dynamic Energy Budget  
603 parameterisation of *Brachidontes pharaonis*, a Lessepsian bivalve in the Mediterranean sea. *Journal of Sea*  
604 *Research* 94,47-51.

605 Montecinos, L. A., Cisterna, J. A., Cáceres, C. W., & Saldías, G. S. (2009). Equilibrio ácido-base durante la  
606 exposición aérea en el molusco bivalvo *Perumytilus purpuratus* (Lamarck, 1819) (Bivalvia: Mytilidae). *Revista*  
607 *de Biología Marina y Oceanografía* 44,181–187.

608 Navarro, J. M., Torres, R., Acuña, K., Duarte, C., Manriquez, P. H., Lardies, M., ... & Aguilera, V. (2013).  
609 Impact of medium-term exposure to elevated pCO<sub>2</sub> levels on the physiological energetics of the mussel *Mytilus*  
610 *chilensis*. *Chemosphere*, 90,1242-1248.

611 Pala, C. (2009). The thermal vents of Maug Island offer a rare chance to study ocean acidification in situ, which  
612 gives us a glimpse of what the future might hold. *Environmental Science and Technology*, 43,6451-6452.

613 Peharda, M., Ezgeta-Balić, D., Radman, M., Sinjkević, N., Vrgoč, N., & Isajlović, I. (2011). Age, growth and  
614 population structure of *Acanthocardia tuberculata* (Bivalvia: Cardiidae) in the eastern Adriatic Sea. *Scientia*  
615 *Marina*, 76,59-66.

616 Pecquerie, L., Nisbet, R. M., Fablet, R., Lorrain, A., & Kooijman, S. A. (2010). The impact of metabolism on  
617 stable isotope dynamics: a theoretical framework. *Philosophical Transactions of the Royal Society of London B:*  
618 *Biological Sciences*, 365,3455-3468.

Formattato: Italiano (Italia)

Formattato: Italiano (Italia)

619 Pörtner, H. O., Langenbuch, M., & Reipschläger, A. (2004). Biological impact of elevated ocean CO<sub>2</sub>  
620 concentration: lessons from animal physiology and Earth history. *Journal of Oceanography*, 60,705–718.

621 Pörtner, H. O., Langenbuch, M., & Michaelidis, B. (2005). Synergistic effects of temperature extremes, hypoxia,  
622 and increases in CO<sub>2</sub> on marine animals: From Earth history to global change. *Journal of Geophysical Research:*  
623 *Oceans*, 110(C9).

624 Pörtner, H. O., & Farrell, A. P. (2008). Physiology and climate change. *Science*, 690-692.

625 Pouvreau, S., Bourles, Y., Lefebvre, S., Gangnery, A., & Alunno-Bruscia, M. (2006). Application of a dynamic  
626 energy budget model to the Pacific oyster, *Crassostrea gigas*, reared under various environmental conditions.  
627 *Journal of Sea Research*, 56,156–167.

628 [Pynnönen, K. S., & Huebner, J. \(1995\). Effects of episodic low pH exposure on the valve movements of the](#)  
629 [freshwater bivalve \*Anodonta cygnea\* L. \*Water Research\*, 29,2579-2582.](#)

630 Rees, B. B., & Hand, S. C. (1990). Heat dissipation, gas exchange and acid–base status in the land snail  
631 *Oreohelix* during shortterm estivation. *Journal of Experimental Biology*, 152,77–92

632 [Ren, J.S., Schiel, D.R. \(2008\). A dynamic energy budget model: parameterisation and application to the Pacific](#)  
633 [oyster \*Crassostrea gigas\* in New Zealand waters. \*Journal of Experimental Marine Biology and Ecology\*, 361,](#)  
634 [42–48.](#)

635 Rivaró, P., Messa, R., Massolo, S., & Frache, R. (2010). Distributions of carbonate properties along the water  
636 column in the Mediterranean Sea: spatial and temporal variations. *Marine Chemistry*, 121,236-245.

637 Roff, D. A. (1992). *The evolution of life histories*. Chapman and Hall, New York.

638 ~~Sarà, G., Romano, C., Widdows, J., & Staff, F. J. (2008). Effect of salinity and temperature on feeding~~  
639 ~~physiology and scope for growth of an invasive species (*Brachidontes pharaonis*—Mollusca: Bivalvia) within~~  
640 ~~the Mediterranean Sea. *Journal of Experimental Marine Biology and Ecology*, 363,130–136.~~

641 Sarà, G., Kearney, M., & Helmuth, B. (2011). Combining heat-transfer and energy budget models to predict  
642 local and geographic patterns of mortality in Mediterranean intertidal mussels. *Chemistry and Ecology*, 27,135-  
643 145.

644 Sarà, G., Reid, G. K., Rinaldi, A., Palmeri, V., Troell, M., & Kooijman, S. A. L. M. (2012). Growth and  
645 reproductive simulation of candidate shellfish species at fish cages in the southern Mediterranean: Dynamic  
646 Energy Budget (DEB) modelling for integrated multi-trophic aquaculture. *Aquaculture*, 324,259-266.

Formattato: Inglese (Stati Uniti)

647 Sarà, G., Palmeri, V., Montalto, V., Rinaldi, A., & Widdows, J. (2013a). Parameterisation of bivalve functional  
648 traits in a context of mechanistic eco-physiological Dynamic Energy Budget model. *Marine Ecology Progress*  
649 *Series*, 480,99–117.

650 Sarà, G., Palmeri, V., Rinaldi, A., Montalto, V., & Helmuth, B. (2013b). Predicting biological invasions in  
651 marine habitats through eco-physiological mechanistic models: a study case with the bivalve *Brachidontes*  
652 *pharaonis*. *Diversity and Distribution* 19,1235-1247.

653 Sarà, G., Rinaldi, A., & Montalto, V. (2014). Thinking beyond organism energy use: a trait based bioenergetic  
654 mechanistic approach for predictions of life history traits in marine organisms. *Marine Ecology*, 35,506-515.

655 [Sarà, G., Mangano, M.C., Johnson, M., Mazzola, A. \(2018a\). Integrating multiple stressors in aquaculture to](#)  
656 [build the blue growth in a changing sea. \*Hydrobiologia\*, 809,5–17.](#)

657 [Sarà, G., Porporato, E.M.D., Mangano, M.C. and Mieszkowska, N. \(2018b\). Multiple stressors facilitate the](#)  
658 [spread of a non-indigenous bivalve in the Mediterranean Sea. \*Journal of Biogeography\*.](#)

659 [Sarà, G., Gouhier, T.C., Brigolin, D., Porporato, E.M.D., Mangano, M.C., Mirto, S., Mazzola, A., Pastres, R. in](#)  
660 [press \(2018c\). Predicting shifting sustainability trade offs in marine finfish aquaculture under climate change.](#)  
661 [Global Change Biology.](#)

662 [Schneider, K.R., \(2008\). Heat stress in the intertidal: comparing survival and growth of an invasive and native](#)  
663 [mussel under a variety of thermal conditions. \*The Biological Bulletin\*, 215,253–264.](#)

664 Schoener, T. W. (1986). Mechanistic approaches to community ecology: a new reductionism. *American*  
665 *Zoologist*, 26,81-106.

666 [Sheldon, F., & Walker, K. F. \(1989\). Effects of hypoxia on oxygen consumption by two species of freshwater](#)  
667 [mussel \(Unionacea: Hyriidae\) from the River Murray. \*Marine and Freshwater Research\*, 40, 491-499.](#)

668 Sokolova, I. M., Frederich, M., Bagwe, R., Lannig, G., & Sukhotin, A. A. (2012). Energy homeostasis as an  
669 integrative tool for assessing limits of environmental stress tolerance in aquatic invertebrates. *Marine*  
670 *environmental research*, 79,1-15.

671 [Sousa T., Domingos T., Poggiale J.C., Kooijman S.A.L.M. \(2010\). Dynamic energy budget theory restores](#)  
672 [coherence in biology. \*Philosophical Transactions of the Royal Society of London. Series B, Biological Sciences\*,](#)  
673 [365: 3413–3428](#)

674 [Stearns S.C. \(1992\). \*The Evolution of Life Histories\*. Oxford University Press, Oxford: 262.](#)

675 [Thomas, Y., Mazurié, J., Pouvreau, S., Bacher, C., Gohin, F., Struski, C., Le Mao, P., \(2006\). Modélisation de la](#)  
676 [croissance de la moule \*Mytilus edulis\* \(L.\), en fonction des pratiques culturelles et de données environnementales.](#)



677 [Application aux résultats de 2003–2004 en baie du Mont Saint-Michel. Rapport d'avancement de contrat N°05/2](#)  
678 [210 106/F. IFREMER, Laboratoire Environnement Ressource Morbihan Pays de Loire, 12 rue des résistants,](#)  
679 [BP86 56740 La Trinité/mer, France.](#)

680 Thomsen, J., Casties, I., Pansch, C., Körtzinger, A., & Melzner, F. (2013). Food availability outweighs ocean  
681 acidification effects in juvenile *Mytilus edulis*: laboratory and field experiments. *Global Change Biology*,  
682 19,1017-1027.

683 Underwood, A. J. (1997). *Experiments in ecology*. Cambridge University Press, Cambridge.

684 [van der Meer, J., \(2006\). An introduction to Dynamic Energy Budget \(DEB\) models with special emphasis on](#)  
685 [parameter estimation. \*Journal of Sea Research\*, 56,85-102.](#)

686 [van der Veer, H. W., Cardoso, J. F., & van der Meer, J. \(2006\). The estimation of DEB parameters for various](#)  
687 [Northeast Atlantic bivalve species. \*Journal of Sea Research\*, 56, 107-124.](#)

688 Walsh, P. J., & Milligan, C. L. (1989). Coordination of metabolism and intracellular acid-base status: ionic  
689 regulation and metabolic consequences. *Canadian Journal of Zoology*, 67,2994–3004.

690 ~~Widdows, J., & Staff, F. (2006). Biological effects of contaminants: measurement of scope for growth in~~  
691 ~~mussels. *ICES Techniques in Marine Environmental Sciences* 40,1–30.~~

692 Zhang, H., Shin, P. K., & Cheung, S. G. (2015). Physiological responses and scope for growth upon medium-  
693 term exposure to the combined effects of ocean acidification and temperature in a subtidal scavenger *Nassarius*  
694 *conoidalis*. *Marine environmental research*, 106,51-60.

**Tables**

Table 1. DEB parameters for *Mytilus galloprovincialis* (1 = Kooijman, 2010; 2= van der Veer et al., 2006; 3 = Sarà et al., 2011; 4 = Thomas et al., 2006; 5 = Schneider, 2008); Lb, Lp, Ls = length at birth, puberty and seeding respectively; dVw = specific density to convert weight into volume; f = functional response type II f = X/(XK + X); ux = chemical potential to convert moles into food energy; SMI is the somatic mass index of both starved and well-fed animals, expressed as somatic ash free dry mass (AFDM, mg); XK = saturation coefficient expressed as a concentration of chlorophyll a ( $\mu\text{g CHL-a l}^{-1}$ ), where the ingestion rate is half of the maximum.

| Symbol             | Description                                                 | Formulation                                                                                          | Units                                    | <i>Mytilus galloprovincialis</i> |     |
|--------------------|-------------------------------------------------------------|------------------------------------------------------------------------------------------------------|------------------------------------------|----------------------------------|-----|
|                    |                                                             |                                                                                                      |                                          | Value                            | Ref |
| Vb                 | Structural volume at birth                                  | $V_b = (L_b \times \delta_m)^3$                                                                      | cm <sup>3</sup>                          | 0.0000013                        | 1   |
| Vs                 | Structural volume at seeding                                | $V_s = (L_s \times \delta_m)^3$                                                                      | cm <sup>3</sup>                          | -                                | -   |
| Vp                 | Structural volume at puberty                                | $V_p = (L_p \times \delta_m)^3$                                                                      | cm <sup>3</sup>                          | 0.06                             | 2   |
| $\delta_m$         | Shape coefficient                                           | $\delta_m = (Ww \times d_{vw}^{-1}) \times L^{-1}$                                                   | -                                        | 0.2254                           | 3   |
| {J <sub>Xm</sub> } | Maximum surface area-specific ingestion rate                | {J <sub>Xm</sub> } = J <sub>X</sub> / (f x V <sup>2/3</sup> )                                        | J cm <sup>-2</sup> h <sup>-1</sup>       | 8.2                              | 4   |
| ae                 | Assimilation efficiency                                     | ae = (ux x Jx) / p <sub>A</sub>                                                                      | -                                        | 0.88                             | 3   |
| X <sub>K</sub>     | Saturation coefficient                                      | -                                                                                                    | $\mu\text{g l}^{-1}$                     | 2.1                              | 3   |
| [E <sub>G</sub> ]  | Volume-specific cost of growth                              | $[E_G] = \text{SMI}_{\text{starved}} \times 23 \times (\delta_m^3)^{-1}$                             | J cm <sup>3</sup>                        | 5.993                            | 5   |
| [E <sub>M</sub> ]  | Maximum storage density                                     | $[E_M] = (\text{SMI}_{\text{fed}} - \text{SMI}_{\text{starved}}) \times 23 \times (\delta_m^3)^{-1}$ | J cm <sup>3</sup>                        | 2.190                            | 2   |
| [p <sub>M</sub> ]  | Volume-specific maintenance cost                            | [p <sub>M</sub> ] = p <sub>M</sub> / V                                                               | $\frac{\text{J cm}^{-3}}{\text{h}^{-1}}$ | 1                                | 2   |
| κ                  | Fraction of utilized energy spent on maintenance and growth | -                                                                                                    | -                                        | 0.7                              | 2   |
| K <sub>R</sub>     | Fraction of reproductive energy                             | -                                                                                                    | -                                        | 0.8                              | 3   |
| T <sub>A</sub>     | Arrhenius temperature                                       | $T_A = \ln  K_{(T_0)} / K_{(T_1)}  \times \frac{(T_1 \times T_0)}{(T_0 - T_1)}$                      | °K                                       | 7.022                            | 2   |
| T <sub>L</sub>     | Lower boundary of tolerance range                           | -                                                                                                    | °K                                       | 275                              | 2   |
| T <sub>H</sub>     | Upper boundary of tolerance range                           | -                                                                                                    | °K                                       | 296                              | 2   |
| T <sub>AL</sub>    | Rate of decrease at lower boundary                          | -                                                                                                    | °K                                       | 45.430                           | 2   |
| T <sub>AH</sub>    | Rate of decrease at upper boundary                          | -                                                                                                    | °K                                       | 31.376                           | 2   |

Table 42. Seawater carbonate chemistry parameters (mean ± se). Seawater pH on the NBS scale (pHNBS), temperature (T; °C), and salinity were used to calculate CO2 partial pressure (pCO2;  $\mu\text{atm}$ ) as well as aragonite and calcite saturation states (respectively  $\Omega_{ar}$  and  $\Omega_{ca}$ ), for a total alkalinity of 2500 mmol kg<sup>-1</sup>.

|  | Measured | Calculated |
|--|----------|------------|
|--|----------|------------|

|      | Temperature (°C) | pH <sub>NBS</sub> | O <sub>2</sub> mg/l | Salinity (PSU) | pCO <sub>2</sub> (µatm) | CO <sub>3</sub> <sup>-</sup> | Ω <sub>ca</sub> | Ω <sub>ar</sub> |
|------|------------------|-------------------|---------------------|----------------|-------------------------|------------------------------|-----------------|-----------------|
| CTRL | 20.77 ± 0.01     | 8.01 ± 0.001      | 7.29 ± 0.02         | 37.18 ± 0.11   | 624.31 ± 4.9            | 167.93 ± 0.95                | 3.95 ± 0.02     | 2.58 ± 0.01     |
| Tr1  | 20.77 ± 0.01     | 7.53 ± 0.002      | 7.30 ± 0.02         | 37.12 ± 0.05   | 2151.17 ± 22.02         | 62.05 ± 0.73                 | 1.46 ± 0.02     | 0.95 ± 0.01     |
| Tr2  | 20.77 ± 0.01     | 8.01 ± 0.001      | 2.44 ± 0.02         | 37.07 ± 0.04   | 729.88 ± 18.24          | 152.53 ± 1.51                | 3.59 ± 0.04     | 2.34 ± 0.02     |
| Tr3  | 20.77 ± 0.01     | 7.53 ± 0.002      | 2.44 ± 0.02         | 37.21 ± 0.17   | 2238.83 ± 20.72         | 59.59 ± 0.42                 | 1.40 ± 0.01     | 0.91 ± 0.01     |

Table 2. ANOVA on seawater chemistry parameters. Comparison between CTRL (normal pH) and TREAT (low pH and hypoxia) (\* = p < 0.05; \*\* = p < 0.01; \*\*\* = p < 0.001; ns = not significant).

|               | pH <sub>NBS</sub> |        |          |     | pO <sub>2</sub> |          |     |  |
|---------------|-------------------|--------|----------|-----|-----------------|----------|-----|--|
|               | df                | MS     | F        | p   | MS              | F        | p   |  |
| TREAT         | 3                 | 10.73  | 41450.84 | *** | 1083.21         | 18798.36 | *** |  |
| Residuals     | 548               | 0.0003 |          |     | 0.06            |          |     |  |
| Cochran's Snk |                   |        |          | *   |                 |          | *   |  |

  

|               | pCO <sub>2</sub> |          |         |     | CO <sub>3</sub> <sup>-</sup> |         |     |  |
|---------------|------------------|----------|---------|-----|------------------------------|---------|-----|--|
|               | df               | MS       | F       | p   | MS                           | F       | p   |  |
| TREAT         | 3                | 1.06e08  | 2426.84 | *** | 460157.7                     | 3433.17 | *** |  |
| Residuals     | 548              | 43851.09 |         |     | 134.03                       |         |     |  |
| Cochran's Snk |                  |          |         | *   |                              |         | *   |  |

  

|               | Ω <sub>ca</sub> |        |         |     | Ω <sub>ar</sub> |         |     |  |
|---------------|-----------------|--------|---------|-----|-----------------|---------|-----|--|
|               | df              | MS     | F       | p   | MS              | F       | p   |  |
| TREAT         | 3               | 254.09 | 3432.44 | *** | 108.26          | 3426.14 | *** |  |
| Residuals     | 548             | 0.07   |         |     | 0.03            |         |     |  |
| Cochran's Snk |                 |        |         | *   |                 |         | *   |  |

Table 3. ANOVA table of results. Effect on valve gape and breaking load of *Mytilus galloprovincialis* (\* = p < 0.05; \*\* = p < 0.01; \*\*\* = p < 0.001; ns = not significant).

| Source | df | Valve gape |   |   | Source | df | Breaking load |   |   |
|--------|----|------------|---|---|--------|----|---------------|---|---|
|        |    | MS         | F | P |        |    | MS            | F | P |

|                |    |                           |                           |      |                |           |         |        |      |    |
|----------------|----|---------------------------|---------------------------|------|----------------|-----------|---------|--------|------|----|
| Treatment (Tr) | 3  | <del>34.53</del><br>17.41 | <del>26.03</del><br>15.60 | ***  | Treatment (Tr) | 3         | 3838.12 | 15.18  | ***  |    |
| Time (Ti)      | 1  | 1.33                      | 2.08                      | 1.87 | ns             | Time (Ti) | 1       | 777.19 | 9.22 | ** |
| Tr x Ti        | 3  | 0.3056                    | 0.27                      | ns   | Tr x Ti        | 3         | 132.92  | 1.58   | ns   |    |
| Residuals      | 40 |                           |                           |      | Residuals      | 56        |         |        |      |    |
| Cochran's C    |    |                           |                           | ns   | Cochran's C    |           |         |        | ns   |    |

Table 4 ANOVA table of results. Respiration rate (RR) and assimilation efficiency (AE) of *Mytilus galloprovincialis* (\* =  $p < 0.05$ ; \*\* =  $p < 0.01$ ; \*\*\* =  $p < 0.001$ ; ns = not significant).

| Source         | df  | RR st    |      |     | AE     |       |     |
|----------------|-----|----------|------|-----|--------|-------|-----|
|                |     | MS       | F    | P   | MS     | F     | P   |
| Treatment (Tr) | 3   | 312.9183 | 6.95 | *** | 0.2783 | 12.21 | *** |
| Time (Ti)      | 1   | 205.1325 | 4.56 | *   | 0.0424 | 1.86  | ns  |
| Tr x Ti        | 3   | 40.7752  | 0.91 | ns  | 0.0198 | 0.87  | ns  |
| Residuals      | 120 | 45.0271  |      |     | 0.0228 |       |     |
| Cochran's C    |     |          |      | *   |        |       | ns  |

Table 5 DEB simulation outputs. Percentage variation of treatments from CTRL: Total length (TL), Total weight (WW), Total reproductive output (TRO), Total reproductive events (RE), Time to maturity (TM).

| DEB outputs (CTRL) after 4 years |          |                       |                    |         |        |              |    |           |
|----------------------------------|----------|-----------------------|--------------------|---------|--------|--------------|----|-----------|
| Site                             | Stressor | Hypoxia events (days) | Frequency (1/Time) | TL (cm) | WW (g) | TRO (n° egg) | RE | TM (days) |
| Trieste                          | CTRL     | 0                     | 0                  | 9.55    | 11.19  | 6.74e637889  | 9  | 232       |
| Palermo                          | CTRL     | 0                     | 0                  | 3.08    | 0.31   | 0            | 0  | 739       |

  

| DEB outputs: percentage variation respect to CTRL after 4 years |            |           |        |        |         |        |        |  |
|-----------------------------------------------------------------|------------|-----------|--------|--------|---------|--------|--------|--|
| Site                                                            | Stressor   | Frequency | TL (%) | WW (%) | TRO (%) | RE (%) | TM (%) |  |
| Trieste                                                         | pH 7.5     | baseline  | -13.44 | -35.20 | -53.49  | -22.22 | 18     |  |
| Trieste                                                         | pH+hypoxia | 1-month   | -14.04 | -36.58 | -54.61  | -22.22 | 18     |  |
| Trieste                                                         | pH+hypoxia | 2-month   | -14.71 | -38.04 | -56.34  | -22.22 | 20     |  |
| Trieste                                                         | pH+hypoxia | 3-month   | -15.40 | -39.52 | -58.01  | -22.22 | 21     |  |
| Trieste                                                         | pH+hypoxia | 4-month   | -16.09 | -40.97 | -59.52  | -22.22 | 22     |  |
| Trieste                                                         | pH+hypoxia | 5-month   | -16.77 | -42.37 | -60.95  | -22.22 | 23     |  |
| Trieste                                                         | pH+hypoxia | 6-month   | -17.38 | -43.62 | -62.26  | -22.22 | 24     |  |
| Palermo                                                         | pH 7.5     | baseline  | -11.47 | -30.69 | 0       | 0      | 16     |  |
| Palermo                                                         | pH+hypoxia | 1-month   | -12.09 | -32.26 | 0       | 0      | 17     |  |
| Palermo                                                         | pH+hypoxia | 2-month   | -12.84 | -33.97 | 0       | 0      | 18     |  |
| Palermo                                                         | pH+hypoxia | 3-month   | -13.42 | -35.26 | 0       | 0      | 20     |  |
| Palermo                                                         | pH+hypoxia | 4-month   | -14.10 | -36.78 | 0       | 0      | 20     |  |
| Palermo                                                         | pH+hypoxia | 5-month   | -14.70 | -38.08 | 0       | 0      | 22     |  |
| Palermo                                                         | pH+hypoxia | 6-month   | -15.42 | -39.63 | 0       | 0      | 23     |  |

  

| Percentage additive contributing effect of Hypoxia |            |                       |             |        |        |         |        |        |
|----------------------------------------------------|------------|-----------------------|-------------|--------|--------|---------|--------|--------|
| Site                                               | Stressor   | Hypoxia events (days) | Frequency   | TL (%) | WW (%) | TRO (%) | RE (%) | TM (%) |
| Trieste                                            | pH+hypoxia | 30                    | 0.081-month | -0.6   | -1.4   | -1.1    | 0      | 0.8    |
| Trieste                                            | pH+hypoxia | 60                    | 0.172-month | -1.3   | -2.8   | -2.8    | 0      | 2.1    |
| Trieste                                            | pH+hypoxia | 90                    | 0.253-month | -2     | -4.3   | -4.5    | 0      | 3.6    |
| Trieste                                            | pH+hypoxia | 120                   | 0.334-month | -2.7   | -5.8   | -6      | 0      | 4.4    |
| Trieste                                            | pH+hypoxia | 150                   | 0.425-month | -3.4   | -7.2   | -7.4    | 0      | 5.5    |
| Trieste                                            | pH+hypoxia | 180                   | 0.506-month | -4     | -8.4   | -8.8    | 0      | 6      |
| Palermo                                            | pH+hypoxia | 30                    | 0.081-month | -0.6   | -1.6   | 0       | 0      | 0.8    |
| Palermo                                            | pH+hypoxia | 60                    | 0.172-month | -1.3   | -3.3   | 0       | 0      | 2.1    |
| Palermo                                            | pH+hypoxia | 90                    | 0.253-month | -1.9   | -4.6   | 0       | 0      | 3.8    |
| Palermo                                            | pH+hypoxia | 120                   | 0.334-month | -2.6   | -6.1   | 0       | 0      | 4.5    |
| Palermo                                            | pH+hypoxia | 150                   | 0.425-month | -3.2   | -7.4   | 0       | 0      | 5.7    |

|         |            |            |                                                       |      |      |   |   |     |
|---------|------------|------------|-------------------------------------------------------|------|------|---|---|-----|
| Palermo | pH+hypoxia | <u>180</u> | <del>month</del><br><u>0.506-</u><br><del>month</del> | -3.9 | -8.9 | 0 | 0 | 7.6 |
|---------|------------|------------|-------------------------------------------------------|------|------|---|---|-----|
